# Supplementary material for: Diastereoselective metal-catalyzed [4 + 2 + 2] carbocyclization reactions utilizing a rhodium N-heterocyclic carbene (NHC) complex: the first example of a rhodium NHC-catalyzed [m+n+o] carbocyclization
Source: Royal Society of Chemistry journal article supplement (doi:10.1039/b413438a), 2004-11-19
Supplement: b413438a.pdf [file b413438a.pdf]

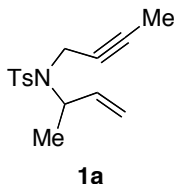

***N*-But-2-yn-1-yl-4-methyl-*N*-(1-methylprop-2-en-1-yl)benzene sulfonamide **1a**.**

**<sup>1</sup>H NMR** (400 MHz, C<sub>6</sub>D<sub>6</sub>) δ 7.83 (m, 2H), 6.87 (d, *J* = 7.6 Hz, 2H), 5.71-5.62 (m, 1H), 4.91 (d, *J* = 16.5 Hz, 1H), 4.88 (d, *J* = 10.4 Hz, 1H), 4.63-4.60 (m, 1H), 4.10-4.05 (m, 1H), 3.79-3.73 (m, 1H), 1.97 (s, 3H), 1.33 (t, *J* = 2.3 Hz, 3H), 1.08 (dd, *J* = 7.0, 2.4 Hz, 3H).

**<sup>13</sup>C NMR** (100 MHz, C<sub>6</sub>D<sub>6</sub>) δ 142.60 (e), 139.22 (e), 138.22 (o), 129.34 (o), 127.92 (o), 116.40 (e), 80.09 (e), 76.09 (e), 55.05 (o), 33.09 (e), 21.15 (o), 17.20 (o), 3.14 (o).

**IR** (neat) 3087 (w), 3066 (w), 2981 (m), 2921 (m), 2230 (w), 1640 (w), 1598 (m), 1336 (vs), 1157 (vs), 1095 (vs) cm<sup>-1</sup>.

**HRMS** (EI, M<sup>+</sup>) calcd for C<sub>15</sub>H<sub>19</sub>NO<sub>2</sub>S 277.1136, found 277.1115.

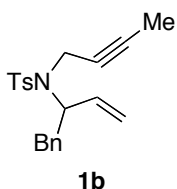

***N*-(1-benzylprop-2-en-1-yl)-*N*-but-2-yn-1-yl-4-methylbenzene sulfonamide **1b**.**

**<sup>1</sup>H NMR** (400 MHz, C<sub>6</sub>D<sub>6</sub>) δ 7.76 (d, *J* = 8.2 Hz, 2H), 7.09-7.01 (m, 5H), 6.72 (d, *J* = 7.9 Hz, 2H), 5.74 (ddd, *J* = 17.1, 10.3, 6.3 Hz, 1H), 4.95-4.84 (m, 3H), 4.15 (dd, A of ABX, *J*<sub>AB</sub> = 18.3 Hz, *J*<sub>AX</sub> = 2.4 Hz, 1H), 3.87 (dd, B of ABX, *J*<sub>AB</sub> = 18.2 Hz, *J*<sub>BX</sub> = 2.4 Hz, 1H), 3.05 (dd, A of ABX, *J*<sub>AB</sub> = 13.6 Hz, *J*<sub>AX</sub> = 6.2 Hz, 1H), 2.84 (dd, B of ABX, *J*<sub>AB</sub> = 13.6 Hz, *J*<sub>BX</sub> = 9.0 Hz, 1H), 1.86 (s, 3H), 1.31 (t, *J* = 2.4 Hz, 3H).

**<sup>13</sup>C NMR** (100 MHz, C<sub>6</sub>D<sub>6</sub>) δ 142.58 (e), 139.16 (e), 138.47 (e), 135.48 (o), 129.65 (o), 129.23 (o), 128.61 (o), 126.59 (o), 118.13 (e), 80.48 (e), 75.86 (e), 61.86 (o), 39.64 (e), 34.06 (e), 21.09 (o), 3.12 (o).

**IR** (neat) 3086 (w), 3064 (w), 3028 (w), 2921 (w), 2856 (w), 1598 (w), 1496 (w), 1455 (w), 1337 (m), 1160 (vs), 1094 (m) cm<sup>-1</sup>.

**HRMS** (EI, M<sup>+</sup>) calcd for C<sub>21</sub>H<sub>23</sub>NO<sub>2</sub>S 353.1449, found 353.1442.

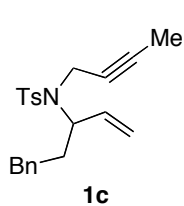

***N*-But-2-yn-1-yl-4-methyl-*N*-[1-(2-phenylethyl)prop-2-en-1-yl]benzenesulfonamide **1c**.**

**<sup>1</sup>H NMR** (400 MHz, C<sub>6</sub>D<sub>6</sub>) δ 7.81 (d, *J* = 8.2 Hz, 2H), 7.15-7.13 (m, 2H), 7.07-7.05 (m, 3H), 6.76 (d, *J* = 7.9 Hz, 2H), 5.59 (ddd, *J* = 17.3, 10.6, 5.8 Hz, 1H), 4.88 (dt, *J* = 17.3, 1.3 Hz, 1H), 4.85 (dt, *J* = 10.5, 1.2 Hz, 1H), 4.57-4.51 (m, 1H), 4.12 (dd, A of ABX, *J*<sub>AB</sub> = 18.3 Hz, *J*<sub>AX</sub> = 2.3 Hz, 1H), 3.79 (dd, B of ABX, *J*<sub>AB</sub> = 18.3 Hz, *J*<sub>BX</sub> = 2.4 Hz, 1H), 2.76 (ddd, A of ABMX, *J*<sub>AB</sub> = 15.0 Hz, *J*<sub>AX</sub> = 10.6 Hz, *J*<sub>AM</sub> = 5.5 Hz, 1H), 2.52 (ddd, B of ABMX, *J*<sub>AB</sub> = 15.0 Hz, *J*<sub>BX</sub> = 10.9 Hz, *J*<sub>BM</sub> = 5.4 Hz, 1H), 2.00-1.90 (m, 1H), 1.87 (s, 3H), 1.80-1.71 (m, 1H), 1.32 (t, *J* = 2.4 Hz, 3H).

**<sup>13</sup>C NMR** (100 MHz, C<sub>6</sub>D<sub>6</sub>) δ 142.65 (e), 142.11 (e), 139.28 (e), 136.45 (o), 129.30 (o), 128.73 (o), 128.61 (o), 127.97 (o), 126.14 (o), 117.44 (e), 79.95 (e), 76.01 (e), 59.90 (o), 33.88 (e), 33.33 (e), 32.98 (e), 21.09 (o), 3.15 (o).

**IR** (neat) 3085 (w), 3063 (w), 3027 (w), 2921 (w), 2859 (w), 1599 (w), 1496 (w), 1455 (w), 1338 (s), 1160 (vs), 1094 (m) cm<sup>-1</sup>.

**HRMS** (EI, M<sup>+</sup>) calcd for C<sub>22</sub>H<sub>25</sub>NO<sub>2</sub>S 367.1606, found 367.1605.

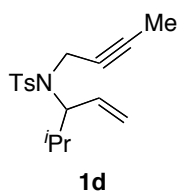

***N*-But-2-yn-1-yl-*N*-(1-isopropylprop-2-en-1-yl)-4-methylbenzenesulfonamide **1d**.**

**<sup>1</sup>H NMR** (400 MHz, C<sub>6</sub>D<sub>6</sub>) δ 7.80 (d, *J* = 8.2 Hz, 2H), 6.83 (d, *J* = 7.9 Hz, 2H), 5.63 (ddd, *J* = 17.1, 10.4, 9.2 Hz, 1H), 4.85 (d, *J* = 16.5 Hz, 1H), 4.84 (d, *J* = 11.0 Hz, 1H), 4.02 (t, *J* = 9.8 Hz, 1H), 4.00-3.85 (m, 2H), 1.93 (s, 3H), 1.81-1.75 (m, 1H), 1.33 (t, *J* = 2.2 Hz, 3H), 1.05 (d, *J* = 6.7 Hz, 3H), 0.76 (t, *J* = 6.7 Hz, 3H).

**<sup>13</sup>C NMR** (100 MHz, C<sub>6</sub>D<sub>6</sub>) δ 142.53 (e), 139.25 (e), 135.20 (o), 129.12 (o), 128.15 (o), 118.52 (e), 80.24 (e), 75.60 (e), 67.85 (o), 33.88 (e), 30.07 (o), 21.12 (o), 20.46 (o), 20.32 (o), 3.09 (o).

IR (neat) 3077 (w), 2963 (m), 2923 (m), 2874 (w), 1599 (w), 1337 (s), 1159 (s), 1092 (s)  $\text{cm}^{-1}$ .

HRMS (EI,  $\text{M}^+$ ) calcd for  $\text{C}_{17}\text{H}_{23}\text{NO}_2\text{S}$  305.1449, found 305.1432.

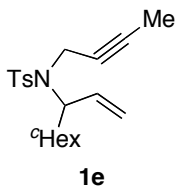

***N*-But-2-yn-1-yl-*N*-(1-cyclohexylprop-2-en-1-yl)-4-methylbenzenesulfonamide **1e**.**

$^1\text{H}$  NMR (400 MHz,  $\text{C}_6\text{D}_6$ )  $\delta$  7.84 (d,  $J = 8.2$  Hz, 2H), 6.77 (d,  $J = 8.2$  Hz, 2H), 5.61 (dt,  $J = 18.1, 9.1$  Hz, 1H), 4.90 (d,  $J = 15.8$  Hz, 1H), 4.85 (d,  $J = 11.5$  Hz, 1H), 4.18 (t,  $J = 9.5$  Hz, 1H), 3.95 (dq, A of ABX,  $J_{AB} = 18.4$  Hz,  $J_{AX} = 2.4$  Hz, 1H), 3.85 (dq, B of ABX,  $J_{AB} = 18.2$  Hz,  $J_{BX} = 2.4$  Hz, 1H), 2.15-2.14 (m, 1H), 1.88 (s, 3H), 1.72-1.47 (m, 5H), 1.33 (t,  $J = 2.4$  Hz, 3H), 1.15-1.08 (m, 4H), 0.78-0.69 (m, 1H).

$^{13}\text{C}$  NMR (100 MHz,  $\text{C}_6\text{D}_6$ )  $\delta$  142.36 (e), 139.48 (e), 135.01 (o), 129.07 (o), 128.17 (o), 118.53 (e), 80.07 (e), 75.70 (e), 66.72 (o), 39.13 (o), 33.84 (e), 30.91 (e), 30.72 (e), 26.66 (e), 26.41 (e), 26.32 (e), 21.09 (o), 3.09 (o).

IR (neat) 3076 (w), 2923 (s), 2852 (s), 1599 (w), 1450 (m), 1337 (s), 1156 (s), 1094 (m), 1040 (m)  $\text{cm}^{-1}$ .

HRMS (EI,  $\text{M}^+$ ) calcd for  $\text{C}_{20}\text{H}_{27}\text{NO}_2\text{S}$  345.1762, found 345.1749.

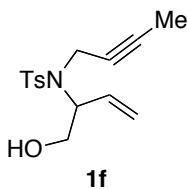

***N*-But-2-yn-1-yl-*N*-[1-(hydroxymethyl)prop-2-en-1-yl]-4-methylbenzenesulfonamide **1f**.**

$^1\text{H}$  NMR (400 MHz,  $\text{C}_6\text{D}_6$ )  $\delta$  7.83 (d,  $J = 8.2$  Hz, 2H), 6.87 (d,  $J = 8.2$  Hz, 2H), 5.56 (ddd,  $J = 16.8, 10.7, 5.5$  Hz, 1H), 4.99 (d,  $J = 17.4$  Hz, 1H), 4.92 (d,  $J = 10.7$  Hz, 1H), 4.66 (dd,  $J = 13.7, 5.8$  Hz, 1H), 4.20 (dd, A of ABX,  $J_{AB} = 18.3$  Hz,  $J_{AX} = 2.4$  Hz, 1H), 3.80 (dd, B of ABX,  $J_{AB} = 18.3$  Hz,  $J_{BX} = 2.1$  Hz, 1H), 3.75-3.72 (m, 1H), 3.69-3.63 (m, 1H), 2.57 (bs, 1H), 1.95 (s, 3H), 1.30 (t,  $J = 2.3$  Hz, 3H).

$^{13}\text{C}$  NMR (100 MHz,  $\text{C}_6\text{D}_6$ )  $\delta$  143.11 (e), 138.69 (e), 133.17 (o), 129.43 (o), 128.02 (o), 118.69 (e), 80.74 (e), 75.62 (e), 62.74 (e), 62.00 (o), 33.70 (e), 21.15 (o), 2.97 (o).

IR (neat) 3538 (bs), 2922 (w), 2882 (w), 1598 (w), 1428 (w), 1333 (m), 1159 (s), 1094 (s), 1054 (m)  $\text{cm}^{-1}$ .

HRMS (EI,  $\text{M}^+$ ) calcd for  $\text{C}_{15}\text{H}_{19}\text{NO}_3\text{S}$  293.1086, found 293.1086.

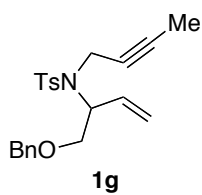

*N*-{1-[(Benzyloxy)methyl]prop-2-en-1-yl}-*N*-but-2-yn-1-yl-4-methylbenzenesulfonamide **1g**.

$^1\text{H}$  NMR (400 MHz,  $\text{C}_6\text{D}_6$ )  $\delta$  7.86 (d,  $J = 8.1$  Hz, 2H), 7.15-7.06 (m, 5H), 6.73 (d,  $J = 8.1$  Hz, 2H), 5.81 (ddd,  $J = 16.8, 10.4, 5.5$  Hz, 1H), 5.12 (d,  $J = 17.4$  Hz, 1H), 5.00 (d,  $J = 10.6$  Hz, 1H), 4.86 (q,  $J = 6.1$  Hz, 1H), 4.24 (dq, A of ABX,  $J_{AB} = 18.0$  Hz,  $J_{AX} = 2.0$  Hz, 1H), 4.18 (d, A of AB,  $J_{AB} = 11.2$  Hz, 1H), 4.15 (d, B of AB,  $J_{AB} = 11.9$  Hz, 1H), 4.02 (dq, B of ABX,  $J_{AB} = 18.0$  Hz,  $J_{BX} = 2.4$  Hz, 1H), 3.61 (dd, A of ABX,  $J_{AB} = 9.9$  Hz,  $J_{AX} = 6.0$  Hz, 1H), 3.53 (dd, B of ABX,  $J_{AB} = 9.9$  Hz,  $J_{BX} = 6.2$  Hz, 1H), 1.88 (s, 3H), 1.28 (t,  $J = 2.4$  Hz, 3H)

$^{13}\text{C}$  NMR (100 MHz,  $\text{C}_6\text{D}_6$ )  $\delta$  142.41 (e), 139.33 (e), 138.61 (e), 134.27 (o), 129.13 (o), 128.46 (o), 128.11 (o), 127.64 (o), 118.31 (e), 80.01 (e), 75.87 (e), 73.02 (e), 71.09 (e), 59.50 (o), 34.53 (e), 21.09 (o), 3.09 (o).

IR (neat) 3064 (m), 3030 (m), 2920 (m), 2861 (m), 1641 (m), 1598 (m), 1496 (m), 1455 (m), 1336 (s), 1159 (vs), 1094 (s).

HRMS (CI,  $\text{M}+\text{H}^+$ ) calcd for  $\text{C}_{22}\text{H}_{26}\text{NO}_3\text{S}$  384.1633, found 384.1635.

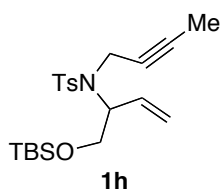

*N*-[1-({*tert*-Butyl(dimethyl)silyl}oxy)methyl]prop-2-en-1-yl]-*N*-but-2-yn-1-yl-4-methylbenzenesulfonamide **1h**.

$^1\text{H}$  NMR (400 MHz,  $\text{C}_6\text{D}_6$ )  $\delta$  7.85 (d,  $J = 8.2$  Hz, 2H), 6.77 (d,  $J = 8.2$  Hz, 2H), 5.88 (ddd,  $J = 17.0, 10.6, 6.1$  Hz, 1H), 5.13 (dt,  $J =$

17.4, 1.5 Hz, 1H), 5.02 (dt,  $J = 10.6, 1.4$  Hz, 1H), 4.65 (q,  $J = 6.3$  Hz, 1H), 4.26 (dq, A of ABX,  $J_{AB} = 18.0, J_{AX} = 2.3$  Hz, 1H), 4.05 (dd, B of ABX,  $J_{AB} = 18.0, J_{BX} = 2.3$  Hz, 1H), 3.90 (dd, A of ABX,  $J_{AB} = 10.3$  Hz,  $J_{AX} = 6.7$  Hz, 1H), 3.86 (dd, B of ABX,  $J_{AB} = 10.3, J_{BX} = 6.0$  Hz, 1H), 1.89 (s, 3H), 1.32 (t,  $J = 2.3$  Hz, 3H), 0.90 (s, 9H), 0.01 (s, 6H).

$^{13}\text{C}$  NMR (100 MHz,  $\text{C}_6\text{D}_6$ )  $\delta$  142.55 (e), 139.39 (e), 134.26 (o), 129.29 (o), 118.72 (e), 80.18 (e), 76.09 (e), 64.90 (e), 61.65 (o), 34.92 (e), 26.04 (o), 21.11 (o), 18.44 (e), 3.16 (o), -5.37 (o).

IR (neat) 2955 (m), 2929 (m), 2885 (m), 2857 (m), 1598 (w), 1495 (w), 1472 (m), 1338 (s), 1161 (vs), 1094 (s)  $\text{cm}^{-1}$ .

HRMS (ESI,  $\text{M}+\text{Na}^+$ ) calcd for  $\text{C}_{21}\text{H}_{33}\text{NNaO}_3\text{SSi}$  430.1848, found 430.1850.

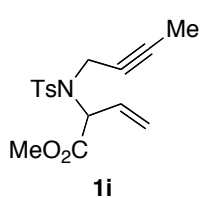

**Methyl 2-{but-2-yn-1-yl}[(4-methylphenyl)sulfonyl]amino}but-3-enoate **1i**.**

$^1\text{H}$  NMR (400 MHz,  $\text{C}_6\text{D}_6$ )  $\delta$  7.84 (d,  $J = 8.2$  Hz, 2H), 6.73 (d,  $J = 8.2$  Hz, 2H), 6.07 (ddd,  $J = 16.8, 10.4, 6.1$  Hz, 1H), 5.28 (d,  $J = 6.1$  Hz,

1H), 5.19 (d,  $J = 17.1$  Hz, 1H), 5.04 (d,  $J = 10.4$  Hz, 1H), 4.29 (dq, A of ABX,  $J_{AB} = 18.0$  Hz,  $J_{AX} = 2.4$  Hz, 1H), 4.13 (dq, B of ABX,  $J_{AB} = 18.0$  Hz,  $J_{BX} = 2.4$  Hz, 1H), 3.19 (s, 3H), 1.85 (s, 3H), 1.26 (t,  $J = 2.4$  Hz, 3H).

$^{13}\text{C}$  NMR (100 MHz,  $\text{C}_6\text{D}_6$ )  $\delta$  170.00 (e), 142.97 (e), 138.25 (e), 131.53 (o), 129.27 (o), 128.17 (o), 120.10 (e), 80.92 (e), 74.71 (e), 61.95 (o), 51.76 (o), 35.93 (e), 21.08 (o), 3.11 (o).

IR (neat) 3030 (w), 2954 (m), 2922 (m), 1746 (vs), 1598 (w), 1436 (m), 1349 (s), 1162 (s), 1093 (s)  $\text{cm}^{-1}$ .

HRMS (EI,  $\text{M}^+$ ) calcd for  $\text{C}_{16}\text{H}_{19}\text{NO}_4\text{S}$  321.1035, found 321.1021.

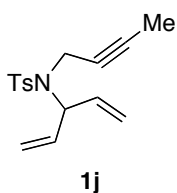

***N*-But-2-yn-1-yl-4-methyl-*N*-(1-vinylprop-2-en-1-yl)benzenesulfonamide **1j**.**

**<sup>1</sup>H NMR** (400 MHz, C<sub>6</sub>D<sub>6</sub>) δ 7.86 (d, *J* = 8.3 Hz, 2H), 6.76 (d, *J* = 8.2 Hz, 2H), 5.79 (2ddd, *J* = 17.1, 10.3, 5.9 Hz, 2H), 5.17-5.14 (m, 1H),

5.02 (2dt, *J* = 17.3, 1.2 Hz, 2H), 4.94 (2dt, *J* = 10.5, 1.2 Hz, 2H), 4.00 (q, *J* = 2.3 Hz, 2H), 1.88 (s, 3H), 1.27 (t, *J* = 2.4 Hz, 3H).

**<sup>13</sup>C NMR** (100 MHz, C<sub>6</sub>D<sub>6</sub>) δ 142.59 (e), 139.36 (e), 135.42 (o), 129.17 (o), 118.30 (e), 80.49 (e), 75.78 (e), 62.44 (o), 34.39 (e), 21.15 (o), 3.15 (o).

**IR** (neat) 2922 (s), 2852 (m), 1598 (w), 1337 (m), 1160 (vs), 1093 (s) cm<sup>-1</sup>.

**HRMS** (EI, M<sup>+</sup>) calcd for C<sub>16</sub>H<sub>19</sub>NO<sub>2</sub>S 289.1136, found 289.1127.

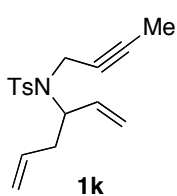

***N*-But-2-yn-1-yl-4-methyl-*N*-(1-vinylbut-3-en-1-yl)benzenesulfonamide **1k**.**

**<sup>1</sup>H NMR** (400 MHz, C<sub>6</sub>D<sub>6</sub>) δ 7.78 (d, *J* = 8.2 Hz, 2H), 6.88 (d, *J* = 7.6 Hz, 2H), 5.70-5.60 (m, 2H), 4.96-4.92 (m, 2H), 4.91-4.88 (m, 2H),

4.53-4.51 (m, 1H), 4.03 (dt, A of ABX, *J*<sub>AB</sub> = 18.3 Hz, *J*<sub>AX</sub> = 2.1 Hz, 1H), 3.84 (dt, B of ABX, *J*<sub>AB</sub> = 18.3 Hz, *J*<sub>BX</sub> = 2.1 Hz, 1H), 2.36 (dt, A of ABX, *J*<sub>AB</sub> = 14.3 Hz, *J*<sub>AX</sub> = 7.6 Hz, 1H), 2.26 (dt, B of ABX, *J*<sub>AB</sub> = 14.3 Hz, *J*<sub>BX</sub> = 7.3 Hz, 1H), 1.97 (s, 3H), 1.34 (t, *J* = 2.1 Hz, 3H).

**<sup>13</sup>C NMR** (100 MHz, C<sub>6</sub>D<sub>6</sub>) δ 142.86 (e), 139.12 (e), 135.99 (o), 135.10 (o), 129.29 (o), 127.97 (o), 117.58 (e), 117.20 (e), 80.35 (e), 75.71 (e), 59.95 (o), 36.85 (e), 33.51 (e), 21.15 (o), 3.12 (o).

**IR** (neat) 3078 (m), 2980 (s), 2921 (m), 2856 (m), 1642 (w), 1598 (w), 1441 (w), 1338 (m), 1160 (vs), 1093 (s) cm<sup>-1</sup>.

**HRMS** (EI, M<sup>+</sup>) calcd for C<sub>17</sub>H<sub>21</sub>NO<sub>2</sub>S 303.1293, found 303.1254.

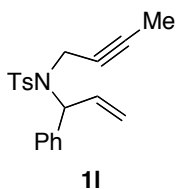

***N*-But-2-yn-1-yl-4-methyl-*N*-(1-phenylprop-2-en-1-yl)benzene sulfonamide **11**.**

<sup>1</sup>H NMR (400 MHz, C<sub>6</sub>D<sub>6</sub>) δ 7.87 (d, *J* = 8.2 Hz, 2H), 7.37 (d, *J* = 7.6 Hz, 2H), 7.10-7.00 (m, 3H), 6.77 (d, *J* = 8.2 Hz, 2H), 6.11 (ddd, *J* = 17.4, 10.7, 7.9 Hz, 1H), 5.80 (d, *J* = 7.6 Hz, 1H), 4.97 (d, *J* = 10.4 Hz, 1H), 4.95 (d, *J* = 17.1 Hz, 1H), 4.13 (dq, A of ABX, *J*<sub>AB</sub> = 18.2 Hz, *J*<sub>AX</sub> = 4.8 Hz, 1H), 3.74 (dq, B of ABX, *J*<sub>AB</sub> = 18.2 Hz, *J*<sub>BX</sub> = 4.6 Hz, 1H), 1.89 (s, 3H), 1.21 (t, *J* = 2.4 Hz, 3H).

<sup>13</sup>C NMR (100 MHz, C<sub>6</sub>D<sub>6</sub>) δ 142.57 (e), 139.25 (e), 139.00 (e), 134.76 (o), 129.06 (o), 128.65 (o), 128.47 (o), 128.35 (o), 118.80 (e), 80.61 (e), 75.42 (e), 63.98 (o), 34.64 (e), 24.113 (o), 3.05 (o).

IR (neat) 3026 (m), 2929 (m), 2855 (m), 1651 (w), 1599 (m), 1495 (m), 1455 (m), 1344 (s), 1161 (vs), 1095 (s) cm<sup>-1</sup>.

HRMS (CI, M+H<sup>+</sup>) calcd for C<sub>20</sub>H<sub>22</sub>O<sub>2</sub>NS 340.1371, found 340.1371.

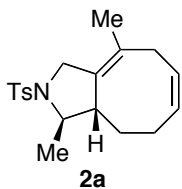

**(6*Z*,9*E*)-3,9-Dimethyl-2-[(4-methylphenyl)sulfonyl]-2,3,3a,4,5,8-hexahydro-1*H*-cycloocta[*c*]pyrrole **2a**.**

*Representative Procedure for Intermolecular Rhodium(I)-Catalyzed [4+2+2] Carbocyclization:* Silver triflate (13.0 mg, 0.05 mmol) was

added to RhCl(IMes)(COD) (14.0 mg, 0.025 mmol) in anhydrous toluene (5.0 mL) under an atmosphere of nitrogen in a sealed tube. The catalyst was allowed stir in the dark for *ca.* 15 minutes. Enyne **1a** (69.0 mg, 0.25 mmol) was then added to the catalyst under a stream of nitrogen. The sealed tube was evacuated and refilled with 1,3-butadiene three times. The sealed tube was then heated in a 110 °C oil bath overnight. The resulting mixture was purified by flash chromatography (eluting with 5-10% ethyl acetate/hexanes) furnishing **2a** (62 mg, 75%) as a clear thick oil.



**<sup>1</sup>H NMR** (400 MHz, C<sub>6</sub>D<sub>6</sub>) δ 7.81 (d,  $J = 7.9$  Hz, 2H), 6.79 (d,  $J = 8.2$  Hz, 2H), 5.52 (ddd,  $J = 11.5, 7.2, 4.8$  Hz, 1H), 5.29-5.23 (m, 1H), 4.08 (d, A of AB,  $J_{AB} = 13.7$  Hz, 1H), 3.86 (dd, B of ABX,  $J_{AB} = 14.0$  Hz,  $J_{BX} = 1.2$  Hz, 1H), 3.68 (dq,  $J = 6.4, 1.2$  Hz, 1H), 2.70-2.63 (m, 2H), 2.18 (dd, B of ABX,  $J_{AB} = 17.6$  Hz,  $J_{BX} = 3.9$  Hz, 1H), 1.99 (dt, A of ABX,  $J_{AB} = 13.6$  Hz,  $J_{AX} = 4.2$  Hz, 1H), 1.88 (s, 3H), 1.71 (ddd, B of ABMX,  $J_{AB} = 13.0$  Hz,  $J_{BX} = 9.8$  Hz,  $J_{BM} = 6.4$  Hz, 1H), 1.28 (s, 3H), 1.23 (d,  $J = 6.5$  Hz, 3H), 1.17-1.09 (m, 1H), 0.80-0.71 (m, 1H).

**<sup>13</sup>C NMR** (100 MHz, C<sub>6</sub>D<sub>6</sub>) δ 142.62 (e), 137.34 (e), 130.78 (e), 130.32 (o), 129.94 (e), 129.55 (o), 129.00 (o), 127.73 (o), 63.18 (o), 50.42 (e), 48.92 (o), 35.91 (e), 29.35 (e), 25.36 (e), 21.86 (o), 21.07 (o), 20.83 (o).

**IR** (neat) 3017 (w), 2929 (m), 2865 (m), 1710 (w), 1652 (w), 1598 (w), 1495 (w), 1455 (m), 1377 (m), 1341 (vs), 1305 (m), 1289 (m), 1163 (vs), 1095 (s), 1050 (m), 1018 (m), 756 (m), 666 (vs), 549 (s) cm<sup>-1</sup>.

**HRMS** (EI, M<sup>+</sup>) calcd. For C<sub>19</sub>H<sub>25</sub>NO<sub>2</sub>S 331.1606, found 331.1590.

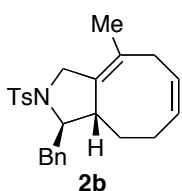

**(6Z,9E)-3-Benzyl-9-methyl-2-[(4-methylphenyl)sulfonyl]-2,3,3a,4,5,8-hexahydro-1H-cycloocta[c]pyrrole 2b.**

**<sup>1</sup>H NMR** (400 MHz, C<sub>6</sub>D<sub>6</sub>) δ 7.82 (d,  $J = 8.2$  Hz, 2H), 7.21 (d,  $J = 7.3$  Hz, 2H), 7.10 (t,  $J = 7.5$  Hz, 2H), 7.03-7.01 (m, 1H), 6.79 (d,  $J = 8.2$  Hz, 2H), 5.46 (ddd,  $J = 11.3, 6.7, 4.8$  Hz, 1H), 5.16-5.09 (m, 1H), 4.02 (dd,  $J = 8.9, 3.7$  Hz, 1H), 3.98 (d, A of AB,  $J_{AB} = 14.0$  Hz, 1H), 3.88-3.83 (m, 1H), 3.15 (dd, A of ABX,  $J_{AB} = 13.1$  Hz,  $J_{AX} = 3.7$  Hz, 1H), 3.00 (dd,  $J = 11.8, 4.5$  Hz, 1H), 2.83 (dd, B of ABX,  $J_{AB} = 13.1$  Hz,  $J_{BX} = 8.5$  Hz, 1H), 2.67 (dd, A of ABX,  $J_{AB} = 18.5$  Hz,  $J_{AX} = 6.6$  Hz, 1H), 2.19 (dd, B of ABX,  $J_{AB} = 18.3$  Hz,  $J_{BX} = 2.1$  Hz, 1H), 1.99-1.89 (m, 1H), 1.87 (s, 3H), 1.58-1.51 (m, 1H), 1.22 (s, 3H), 0.95 (tt, A of ABX,  $J_{AB} = 12.4$  Hz,  $J_{AX} = 4.2$  Hz, 1H), 0.63 (tt, B of ABX,  $J_{AB} = 12.5$  Hz,  $J_{BX} = 4.7$  Hz, 1H).

$^{13}\text{C}$  NMR (100 MHz,  $\text{C}_6\text{D}_6$ )  $\delta$  142.71 (e), 138.68 (e), 137.43 (e), 130.82 (e), 130.14 (o), 129.91 (o), 129.59 (o), 129.18 (e), 128.53 (o), 128.49 (o), 127.67 (o), 126.57 (o), 68.55 (o), 50.71 (e), 44.80 (o), 42.75 (e), 36.37 (e), 29.15 (e), 24.85 (e), 21.06 (o), 20.84 (o).

IR (neat) 3062 (w), 3025 (w), 2928 (m), 2854 (w), 1731 (w), 1654 (w), 1598 (w), 1494 (m), 1454 (m), 1343 (vs), 1161 (vs), 1096 (s), 1056 (m), 1017 (w), 751 (s), 668 (s), 547 (s)  $\text{cm}^{-1}$ .

HRMS (CI,  $\text{M}+\text{H}^+$ ) calcd for  $\text{C}_{25}\text{H}_{30}\text{NO}_2\text{S}$  408.1992, found 408.1982.

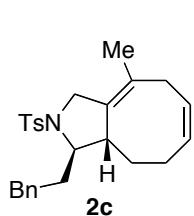

**(6Z,9E)-9-Methyl-2-[(4-methylphenyl)sulfonyl]-3-(2-phenylethyl)-2,3,3a,4,5,8-hexahydro-1H-cycloocta[c]pyrrole 2c.**

$^1\text{H}$  NMR (400 MHz,  $\text{C}_6\text{D}_6$ )  $\delta$  7.79 (d,  $J = 8.2$  Hz, 2H), 7.17-7.05 (m, 5H), 6.76 (d,  $J = 8.1$  Hz, 2H), 5.52 (ddd,  $J = 11.4, 7.2, 4.7$  Hz, 1H), 5.25 (q,  $J = 9.0$  Hz, 1H), 4.10 (d, A of AB,  $J_{AB} = 14.1$  Hz, 1H), 3.95 (dd, B of ABX,  $J_{AB} = 14.2$  Hz,  $J_{BX} = 1.1$  Hz, 1H), 3.72 (dd,  $J = 7.3, 5.1$  Hz, 1H), 2.87 (dd,  $J = 11.8, 3.7$  Hz, 1H), 2.76-2.63 (m, 3H), 2.23-2.09 (m, 2H), 2.05-1.96 (m, 1H), 1.91-1.82 (m, 1H), 1.86 (s, 3H), 1.73-1.65 (m, 1H), 1.28 (s, 3H), 1.09 (tt, A of ABX,  $J_{AB} = 12.3$  Hz,  $J_{AX} = 4.0$  Hz, 1H), 0.63 (tt, B of ABX,  $J_{AB} = 12.5$  Hz,  $J_{BX} = 4.7$  Hz, 1H).

$^{13}\text{C}$  NMR (100 MHz,  $\text{C}_6\text{D}_6$ )  $\delta$  142.82 (e), 142.08 (e), 137.17 (e), 131.24 (e), 130.51 (o), 129.70 (o), 129.63 (o), 128.84 (o), 128.81 (o), 128.67 (o), 127.78 (e), 126.11 (o), 67.22 (o), 50.96 (e), 46.29 (o), 38.22 (e), 36.19 (e), 32.59 (e), 29.58 (e), 25.30 (e), 21.11 (o), 20.92 (o).

IR (neat) 3062 (w), 3024 (m), 2927 (m), 2856 (m), 1652 (w), 1599 (w), 1496 (m), 1454 (m), 1343 (s), 1305 (m), 1290 (w), 1161 (vs), 1095 (m), 1050 (m), 1017 (w), 753 (m), 668 (s), 548 (m)  $\text{cm}^{-1}$ .

HRMS (CI,  $\text{M}+\text{H}^+$ ) calcd for  $\text{C}_{26}\text{H}_{32}\text{NO}_2\text{S}$  422.2148, found 422.2138.

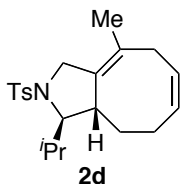

**(6Z,9E)-3-Isopropyl-9-methyl-2-[(4-methylphenyl)sulfonyl]-2,3,3a,4,5,8-hexahydro-1H-cycloocta[c]pyrrole 2d.**

**<sup>1</sup>H NMR** (400 MHz, C<sub>6</sub>D<sub>6</sub>) δ 7.84 (d, *J* = 8.2 Hz, 2H), 6.78 (d, *J* = 7.9 Hz, 2H), 5.51 (ddd, *J* = 11.3, 7.0, 4.6 Hz, 1H), 5.24 (q, *J* = 9.0 Hz, 1H), 4.11 (d, A of AB, *J*<sub>AB</sub> = 14.3 Hz, 1H), 3.99 (d, B of AB, *J*<sub>AB</sub> = 14.0 Hz, 1H), 3.65 (d, *J* = 4.6 Hz, 1H), 2.98 (dd, *J* = 11.6, 4.0 Hz, 1H), 2.68 (dd, A of ABX, *J*<sub>AB</sub> = 18.2 Hz, *J*<sub>AX</sub> = 6.6 Hz, 1H), 2.30-2.19 (m, 2H), 2.08-1.97 (m, 1H), 1.86 (s, 3H), 1.70-1.64 (m, 1H), 1.28 (s, 3H), 1.08 (tt, A of ABX, *J*<sub>AB</sub> = 12.4 Hz, *J*<sub>AX</sub> = 4.2 Hz, 1H), 0.92 (d, *J* = 7.0 Hz, 3H), 0.87 (d, *J* = 6.7 Hz, 3H), 0.63 (tt, B of ABX, *J*<sub>AB</sub> = 12.7 Hz, *J*<sub>BX</sub> = 4.4 Hz, 1H).

**<sup>13</sup>C NMR** (100 MHz, C<sub>6</sub>D<sub>6</sub>) δ 142.70 (e), 137.12 (e), 132.23 (e), 130.44 (o), 129.55 (o), 128.61 (o), 128.08 (e), 127.85 (o), 73.08 (o), 51.89 (e), 41.88 (o), 36.24 (e), 34.16 (o), 30.34 (e), 25.08 (e), 21.07 (o), 20.89 (o), 19.49 (o), 17.22 (o).

**IR** (neat) 3017 (w), 2960 (m), 2929 (m), 2871 (m), 1653 (w), 1599 (w), 1494 (w), 1463 (m), 1388 (w), 1344 (s), 1305 (m), 1290 (m), 1162 (vs), 1094 (m), 1051 (m), 1017 (m), 669 (s) cm<sup>-1</sup>.

**HRMS** (CI, M+H<sup>+</sup>) calcd for C<sub>21</sub>H<sub>30</sub>NO<sub>2</sub>S 360.1992, found 360.2007.

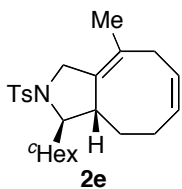

**(6Z,9E)-3-Cyclohexyl-9-methyl-2-[(4-methylphenyl)sulfonyl]-2,3,3a,4,5,8-hexahydro-1H-cycloocta[c]pyrrole 2e.**

**<sup>1</sup>H NMR** (400 MHz, C<sub>6</sub>D<sub>6</sub>) δ 7.86 (d, *J* = 8.2 Hz, 2H), 6.78 (d, *J* = 7.9 Hz, 2H), 5.53 (ddd, *J* = 11.3, 6.9, 4.8 Hz, 1H), 5.31-5.24 (m, 1H), 4.09 (d, A of AB, *J*<sub>AB</sub> = 14.0 Hz, 1H), 4.05-4.01 (m, 1H), 3.67 (d, *J* = 4.9 Hz, 1H), 3.05 (dd, *J* = 11.8, 3.9 Hz, 1H), 2.71 (dd, A of ABX, *J*<sub>AB</sub> = 18.0 Hz, *J*<sub>AX</sub> = 6.7 Hz, 1H), 2.22 (d, B of AB, *J*<sub>AB</sub> = 18.0 Hz, 1H), 2.10-2.00 (m, 1H), 1.95-1.89 (m, 1H), 1.86 (s, 3H), 1.79-1.56 (m, 6H), 1.29 (s, 3H), 1.26-0.95 (m, 6H), 0.65 (tt, B of ABX, *J*<sub>AB</sub> = 12.5 Hz, *J*<sub>BX</sub> = 4.8 Hz, 1H).

<sup>13</sup>C NMR (100 MHz, C<sub>6</sub>D<sub>6</sub>) δ 142.64 (e), 137.40 (e), 132.43 (e), 130.46 (o), 129.53 (o), 129.79 (o), 128.12 (e), 127.86 (o), 72.89 (o), 51.91 (e), 44.34 (o), 42.86 (o), 36.27 (e), 30.44 (e), 30.19 (e), 28.36 (e), 26.83 (e), 26.66 (e), 26.52 (e), 25.22 (e), 21.06 (o), 20.90 (o).

IR (neat) 3018 (w), 2926 (vs), 2853 (s), 1654 (w), 1598 (w), 1494 (w), 1449 (m), 1342 (m), 1304 (m), 1289 (m), 1161(vs), 1094 (m), 1052 (m), 1017 (w), 756 (m), 670 (m), 546 (m) cm<sup>-1</sup>.

HRMS (CI, M+H<sup>+</sup>) calcd for C<sub>24</sub>H<sub>34</sub>NO<sub>2</sub>S 400.2305, found 400.2314.

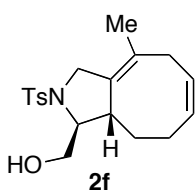

**{(3aE,6Z)-4-Methyl-2-[(4-methylphenyl)sulfonyl]-2,3,5,8,9,9a-hexahydro-1H-cycloocta[c]pyrrol-1-yl}methanol 2f.**

<sup>1</sup>H NMR (400 MHz, C<sub>6</sub>D<sub>6</sub>) δ 7.78 (d, *J* = 8.2 Hz, 2H), 6.77 (d, *J* = 8.1 Hz, 2H), 5.50 (ddd, *J* = 11.5, 7.3, 4.9 Hz, 1H), 5.21 (q, *J* = 8.9 Hz, 1H), 4.14 (d, A of AB, *J*<sub>AB</sub> = 14.0 Hz, 1H), 3.83 (d, B of AB, *J*<sub>AB</sub> = 14.0 Hz, 1H), 3.74 (dd, *J* = 12.5, 8.2 Hz, 1H), 3.56-3.55 (m, 2H), 2.99 (d, *J* = 9.4 Hz, 1H), 2.68 (dd, A of ABX, *J*<sub>AB</sub> = 17.4 Hz, *J*<sub>AX</sub> = 7.3 Hz, 1H), 2.50 (bs, 1H), 2.11 (dd, B of ABX, *J*<sub>AB</sub> = 17.0 Hz, *J*<sub>BX</sub> = 4.3 Hz, 1H), 1.96-1.86 (m, 1H), 1.85 (s, 3H), 1.73-1.65 (m, 1H), 1.26 (s, 3H), 1.07 (tt, A of ABX, *J*<sub>AB</sub> = 11.0 Hz, *J*<sub>AX</sub> = 3.8 Hz, 1H), 0.46 (ddt, B of ABMX, *J*<sub>AB</sub> = 11.5 Hz, *J*<sub>BX</sub> = 5.9 Hz, *J*<sub>BM</sub> = 4.0 Hz, 1H).

<sup>13</sup>C NMR (100 MHz, C<sub>6</sub>D<sub>6</sub>) δ 143.20 (e), 135.83 (e), 130.72 (o), 130.37 (e), 130.11 (e), 129.71 (o), 128.74 (o), 127.92 (o), 69.12 (o), 65.61 (e), 51.62 (e), 44.05 (o), 35.83 (e), 29.63 (e), 25.40 (e), 21.08 (o), 20.80 (o).

IR (neat) 3512 (bs), 3017 (m), 2930 (m), 2855 (m), 1598 (w), 1494 (w), 1453 (m), 1400 (w), 1380 (w), 1340 (s), 1306 (m), 1290 (m), 1216 (w), 1161 (vs), 1095 (s), 1054 (m), 1017 (m), 756 (m), 668 (s), 547 (m) cm<sup>-1</sup>.

HRMS (EI, M-OCH<sub>3</sub><sup>+</sup>) calcd for C<sub>18</sub>H<sub>22</sub>NO<sub>2</sub>S 316.1371, found 316.1374.

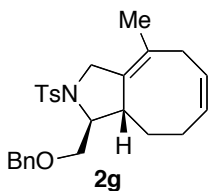

**(6Z,9E)-3-[(Benzyloxy)methyl]-9-methyl-2-[(4-methylphenyl)sulfonyl]-2,3,3a,4,5,8-hexahydro-1H-cycloocta[c]pyrrole 2g.**

$^1\text{H NMR}$  (400 MHz,  $\text{C}_6\text{D}_6$ )  $\delta$  7.80 (d,  $J = 8.2$  Hz, 2H), 7.22 (d,  $J = 7.3$  Hz, 2H), 7.16-7.13 (m, 2H), 7.07 (t,  $J = 7.3$  Hz, 1H), 6.74 (d,  $J = 8.2$  Hz, 2H), 5.53 (ddd,  $J = 11.3, 7.0, 4.6$  Hz, 1H), 5.24 (q,  $J = 9.1$  Hz, 1H), 4.33 (d, A of AB,  $J_{AB} = 12.2$  Hz, 1H), 4.26 (d, B of AB,  $J_{AB} = 12.2$  Hz, 1H), 4.12 (d, A of AB,  $J_{AB} = 13.7$  Hz, 1H), 3.94-3.88 (m, 2H), 3.83 (dd,  $J = 9.1, 4.2$  Hz, 1H), 3.42 (t,  $J = 8.7$  Hz, 1H), 3.33 (dd,  $J = 11.8, 3.9$  Hz, 1H), 2.73 (dd, A of ABX,  $J_{AB} = 17.7$  Hz,  $J_{AX} = 7.0$  Hz, 1H), 2.19 (dd, B of ABX,  $J_{AB} = 17.9$  Hz,  $J_{BX} = 3.6$  Hz, 1H), 2.00 (ddd, A of ABMX,  $J_{AB} = 13.3$  Hz,  $J_{AX} = 11.3$  Hz,  $J_{AM} = 4.0$  Hz, 1H), 1.84 (s, 3H), 1.75-1.68 (m, 1H), 1.26 (s, 3H), 1.20 (tt, A of ABX,  $J_{AB} = 12.2$  Hz,  $J_{AX} = 4.0$  Hz, 1H), 0.62 (tt, B of ABX,  $J_{AB} = 12.5$  Hz,  $J_{AX} = 4.8$  Hz, 1H).

$^{13}\text{C NMR}$  (100 MHz,  $\text{C}_6\text{D}_6$ )  $\delta$  142.81 (e), 139.06 (e), 136.80 (e), 130.92 (e), 130.49 (o), 129.63 (e), 129.58 (o), 128.75 (o), 128.48 (o), 128.29 (o), 127.70 (o), 127.61 (o), 73.24 (e), 73.18 (e), 66.60 (o), 51.17 (e), 44.23 (o), 36.16 (e), 29.56 (e), 25.35 (e), 21.08 (o), 20.86 (o).

**IR** (neat) 3063 (w), 3026 (w), 2928 (m), 2857 (m), 1723 (w), 1652 (w), 1598 (w), 1454 (m), 1400 (w), 1345 (vs), 1306 (m), 1163 (vs), 1096 (s), 739 (m), 667 (s), 547 (m)  $\text{cm}^{-1}$ .

**HRMS** (CI,  $\text{M}+\text{H}^+$ ) calcd for  $\text{C}_{26}\text{H}_{32}\text{NO}_3\text{S}$  438.2097, found 438.2093.

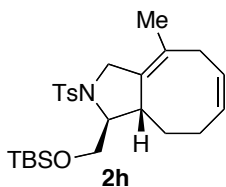

**(6Z,9E)-3-([*tert*-Butyl(dimethyl)silyl]oxy)methyl)-9-methyl-2-[(4-methylphenyl)sulfonyl]-2,3,3a,4,5,8-hexahydro-1H-cycloocta[c]pyrrole 2h.**

$^1\text{H NMR}$  (400 MHz,  $\text{C}_6\text{D}_6$ )  $\delta$  7.80 (d,  $J = 8.2$  Hz, 2H), 6.77 (d,  $J = 7.9$  Hz, 2H), 5.55 (ddd,  $J = 11.3, 7.2, 4.5$  Hz, 1H), 5.29-5.22 (m, 1H), 4.16 (d, A of AB,  $J_{AB} = 13.7$  Hz, 1H), 4.00 (dd,  $J = 9.8, 3.7$  Hz, 1H), 3.89 (dd, B of ABX,  $J_{AB} = 13.7$  Hz,

$J_{BX} = 1.2$  Hz 1H), 3.76 (dd, A of ABX,  $J_{AB} = 7.9$  Hz,  $J_{AX} = 3.4$  Hz, 1H), 3.61 (dd, B of ABX,  $J_{AB} = 9.8$  Hz,  $J_{BX} = 8.3$  Hz, 1H), 3.34 (dd,  $J = 11.9, 3.7$  Hz, 1H), 2.77 (dd, A of ABX,  $J_{AB} = 18.3$  Hz,  $J_{AX} = 7.0$  Hz, 1H), 2.24 (d, B of AB,  $J_{AB} = 18.0$  Hz, 1H), 2.09-1.88 (m, 1H), 1.86 (s, 3H), 1.74 (ddt,  $J = 11.9, 7.8, 4.2$  Hz, 1H), 1.30 (s, 3H), 1.21 (tt, A of ABX,  $J_{AB} = 12.2$  Hz,  $J_{AX} = 3.8$  Hz, 1H), 0.93 (s, 9H), 0.61 (tt, B of ABX,  $J_{AB} = 12.5$  Hz,  $J_{BX} = 4.7$  Hz, 1H), 0.06 (s, 3H), 0.05 (s, 3H).

$^{13}\text{C}$  NMR (100 MHz,  $\text{C}_6\text{D}_6$ )  $\delta$  142.79 (e), 136.79 (e), 131.08 (e), 130.45 (o), 129.60 (o), 129.20 (e), 128.78 (o), 127.78 (e), 68.46 (o), 66.32 (e), 51.58 (e), 43.47 (o), 36.23 (e), 29.76 (e), 25.98 (o), 25.33 (e), 21.07 (o), 20.93 (o), 18.32 (e), -5.22 (o), -5.41 (o).

IR (neat) 3018 (m), 2929 (vs), 2857 (s), 1920 (w), 1718 (w), 1655 (w), 1599 (m), 1494 (w), 1463 (m), 1384 (m), 1346 (s), 1255 (s), 1215 (w), 1163 (vs), 1096 (vs), 1017 (m), 1006 (m)  $\text{cm}^{-1}$ .

HRMS (CI,  $\text{M}+\text{H}^+$ ) calcd for  $\text{C}_{25}\text{H}_{40}\text{NO}_3\text{SSi}$  462.2493, found 462.2493.

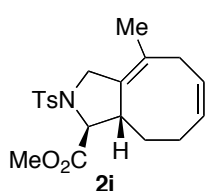

**Methyl (3aE,6Z)-4-methyl-2-[(4-methylphenyl)sulfonyl]-2,3,5,8,9,9a-hexahydro-1H-cycloocta[c]pyrrole-1-carboxylate 2i.**

$^1\text{H}$  NMR (400 MHz,  $\text{C}_6\text{D}_6$ )  $\delta$  7.87 (d,  $J = 8.2$  Hz, 2H), 6.79 (d,  $J = 7.9$  Hz, 2H), 5.46 (ddd,  $J = 11.5, 7.6, 4.6$  Hz, 1H), 5.26-5.19 (m, 1H), 4.54 (d,  $J = 0.9$  Hz, 1H), 4.25 (d, A of AB,  $J_{AB} = 12.8$  Hz, 1H), 4.12 (d, B of AB,  $J_{AB} = 13.1$  Hz, 1H), 3.43-3.37 (m, 1H), 3.18 (s, 3H), 2.53 (dd, A of ABX,  $J_{AB} = 18.3$  Hz,  $J_{AX} = 7.3$  Hz, 1H), 2.18 (d, B of AB,  $J_{AB} = 18.0$  Hz, 1H), 2.07-1.97 (m, 1H), 1.87 (s, 3H), 1.76-1.69 (m, 1H), 1.39 (tt, A of ABX,  $J_{AB} = 12.2$  Hz,  $J_{AX} = 4.1$  Hz, 1H), 1.31-1.15 (m, 1H), 1.18 (s, 3H).

$^{13}\text{C}$  NMR (100 MHz,  $\text{C}_6\text{D}_6$ )  $\delta$  172.07 (e), 142.92 (e), 137.40 (e), 130.21 (e), 129.82 (o), 129.55 (o), 129.18 (o), 67.78 (o), 51.64 (o), 51.26 (e), 45.91 (o), 35.87 (e), 30.34 (e), 25.16 (e), 21.06 (o), 20.97 (o).

**IR** (neat) 3021 (w), 2932 (w), 2857 (w), 1743 (s), 1598 (w), 1495 (w), 1437 (m), 1347 (vs), 1306 (w), 1289 (m), 1207 (m), 1163 (vs), 1096 (s), 1070 (m), 1018 (w), 755 (m), 670 (s), 549 (m)  $\text{cm}^{-1}$ .

**HRMS** (CI,  $\text{M}+\text{H}^+$ ) calcd for  $\text{C}_{20}\text{H}_{26}\text{NO}_4\text{S}$  376.1577, found 376.1584.

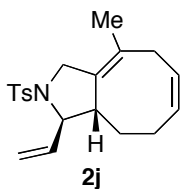

**(6Z,9E)-9-Methyl-2-[(4-methylphenyl)sulfonyl]-3-vinyl-2,3,3a,4,5,8-hexahydro-1H-cycloocta[c]pyrrole 2j.**

**$^1\text{H}$  NMR** (400 MHz,  $\text{C}_6\text{D}_6$ )  $\delta$  7.83 (d,  $J = 8.2$  Hz, 2H), 6.79 (d,  $J = 7.9$  Hz, 2H), 5.70 (ddd,  $J = 17.1, 10.3, 7.0$  Hz, 1H), 5.51 (ddd,  $J = 11.5, 7.3, 4.9$  Hz, 1H), 5.31-5.24 (m, 1H), 5.21 (dt,  $J = 17.1, 1.2$  Hz, 1H), 4.95 (dt,  $J = 10.4, 1.1$  Hz, 1H), 4.05-4.01 (m, 2H), 3.96-3.92 (m, 1H), 2.86 (d,  $J = 10.4$  Hz, 1H), 2.64 (dd, A of ABX,  $J_{AB} = 17.1$  Hz,  $J_{AX} = 7.3$  Hz, 1H), 2.16 (dd, B of ABX,  $J_{AB} = 17.4$ ,  $J_{BX} = 4.3$  Hz, 1H), 2.01 (dd, A of ABMX,  $J_{AB} = 18.6$  Hz,  $J_{AX} = 13.7$  Hz,  $J_{AM} = 4.0$  Hz, 1H), 1.88 (s, 3H), 1.81-1.73 (m, 1H), 1.32-1.27 (m, 1H), 1.26 (s, 3H), 1.05-0.97 (m, 1H).

**$^{13}\text{C}$  NMR** (100 MHz,  $\text{C}_6\text{D}_6$ )  $\delta$  142.71 (e), 138.21 (o), 136.99 (e), 130.52 (e), 130.05 (o), 129.93 (e), 129.44 (o), 129.30 (o), 128.12 (o), 115.17 (e), 69.58 (o), 50.97 (e), 47.85 (o), 35.67 (e), 29.09 (e), 25.42 (e), 21.09 (o), 20.87 (o).

**IR** (neat) 3015 (w), 2027 (m), 2856 (w), 1645 (w), 1598 (w), 1494 (w), 1452 (w), 1345 (vs), 1163 (vs), 1095 (s), 1058 (m), 1017 (m), 669 (s)  $\text{cm}^{-1}$ .

**HRMS** (EI,  $\text{M}^+$ ) calcd for  $\text{C}_{20}\text{H}_{25}\text{NO}_2\text{S}$  343.1606, found 343.1600.

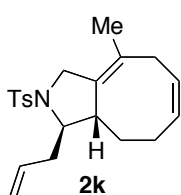

**(6Z,9E)-3-Allyl-9-methyl-2-[(4-methylphenyl)sulfonyl]-2,3,3a,4,5,8-hexahydro-1H-cycloocta[c]pyrrole 2k.**

**$^1\text{H}$  NMR** (400 MHz,  $\text{C}_6\text{D}_6$ )  $\delta$  7.81 (d,  $J = 8.2$  Hz, 2H), 6.81 (d,  $J = 8.2$  Hz, 2H), 5.78 (ddt,  $J = 17.1, 10.1, 7.0$  Hz, 1H), 5.50 (ddd,  $J = 11.3, 7.0, 4.6$  Hz, 1H), 5.28-5.21 (m, 1H), 5.00 (dd,  $J = 17.1, 1.5$  Hz, 1H), 4.97 (d,  $J = 10.4$  Hz,

1H), 4.06 (d, A of AB,  $J_{AB}$  = 13.7 Hz, 1H), 3.90 (dd, B of ABX,  $J_{AB}$  = 14.0 Hz,  $J_{BX}$  = 1.2 Hz, 1H), 3.77 (dd,  $J$  = 8.2, 4.0 Hz, 1H), 2.95 (dd,  $J$  = 11.6, 4.0 Hz, 1H), 2.71 (dd, A of ABX,  $J_{AB}$  = 18.0 Hz,  $J_{AX}$  = 6.7 Hz, 1H), 2.58-2.52 (m, 1H), 2.34 (dt,  $J$  = 13.7, 7.4 Hz, 1H), 2.21 (dd, B of ABX,  $J_{AB}$  = 17.9 Hz,  $J_{BX}$  = 3.6 Hz, 1H), 2.06-1.92 (m, 1H), 1.90 (s, 3H), 1.73-1.67 (m, 1H), 1.30 (s, 3H), 1.17-1.09 (m, 1H), 0.69 (tt, B of ABX,  $J_{AB}$  = 12.5 Hz,  $J_{BX}$  = 4.5 Hz, 1H).

<sup>13</sup>C NMR (100 MHz, C<sub>6</sub>D<sub>6</sub>) δ 142.77 (e), 137.32 (e), 134.92 (o), 131.02 (e), 130.38 (o), 129.59 (o), 129.50 (e), 128.68 (o), 127.71 (o), 117.51 (e), 66.99 (o), 50.89 (e), 45.34 (o), 41.01 (e), 36.23 (e), 29.53 (e), 25.13 (e), 21.09 (o), 20.91 (o).

IR (neat) 3074 (w), 3015 (w), 2926 (m), 2853 (m), 1640 (w), 1599 (w), 1494 (w), 1441 (w), 1345 (vs), 1163 (vs), 1096 (s), 1054 (m), 1017 (m), 668 (s), 547 (s) cm<sup>-1</sup>.

HRMS (CI, M+H<sup>+</sup>) calcd. for C<sub>21</sub>H<sub>28</sub>NO<sub>2</sub>S 358.1841, found 358.1838.

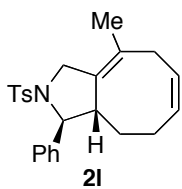

**(6Z,9E)-9-Methyl-2-[(4-methylphenyl)sulfonyl]-3-phenyl-2,3,3a,4,5,8-hexahydro-1H-cycloocta[c]pyrrole 2l.**

<sup>1</sup>H NMR (400 MHz, C<sub>6</sub>D<sub>6</sub>) δ 7.63 (d,  $J$  = 8.2 Hz, 2H), 7.24 (d,  $J$  = 7.3 Hz, 2H), 7.08-7.00 (m, 3H), 6.69 (d,  $J$  = 7.9 Hz, 2H), 5.38 (ddd,  $J$  =

11.4, 7.1, 4.8 Hz, 1H), 5.26-5.20 (m, 1H), 4.85 (s, 1H), 4.20 (s, 2H), 3.15 (dd,  $J$  = 11.4, 3.6 Hz, 1H), 2.50 (dd, A of ABX,  $J_{AB}$  = 18.1 Hz,  $J_{AX}$  = 6.8 Hz, 1H), 2.13-2.03 (m, 2H), 1.84 (s, 3H), 1.77-1.71 (m, 1H), 1.44 (tt, A of ABX,  $J_{AB}$  = 12.3 Hz,  $J_{AX}$  = 4.1 Hz, 1H), 1.28 (s, 3H), 1.20-1.12 (m, 1H).

<sup>13</sup>C NMR (100 MHz, C<sub>6</sub>D<sub>6</sub>) δ 143.60(e), 142.47(e), 137.23(e), 130.84 (e), 130.16 (o), 129.91 (e), 129.31 (o), 128.82 (o), 128.67 (o), 127.36 (o), 126.79 (o), 70.80 (o), 51.57 (e), 50.59 (o), 35.93 (e), 30.14 (e), 25.19 (e), 21.05 (o), 21.02 (o).



**IR** (neat) 3063 (w), 3026 (w), 2929 (m), 2855 (m), 1650 (w), 1599 (w), 1495 (w), 1455 (m), 1400 (w), 1344 (vs), 1306 (m), 1290 (m), 1163 (vs), 1095 (s), 1071 (m), 1031 (m), 1017 (m), 756 (vs), 670 (vs)  $\text{cm}^{-1}$ .

**HRMS** (EI,  $\text{M}^+$ ) calcd. for  $\text{C}_{24}\text{H}_{27}\text{NO}_2\text{S}$  393.1762, found 393.1753.

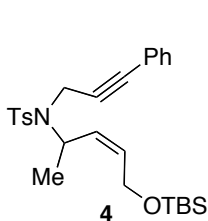

***N*-((*2Z*)-4-{{*tert*-Butyl(dimethyl)silyl}oxy}-1-methylbut-2-en-1-yl)-4-methyl-*N*-(3-phenylprop-2-yn-1-yl)benzenesulfonamide **4**.**

**$^1\text{H}$  NMR** (400 MHz,  $\text{CDCl}_3$ )  $\delta$  7.80 (d,  $J = 8.3$  Hz, 2H), 7.28-7.17 (m, 7H), 5.59-5.52 (m, 2H), 4.85 (dq,  $J = 10.6, 7.0$  Hz, 1H), 4.32 (s, 2H), 4.29-4.24 (m, 1H), 4.15-4.10 (m, 1H), 2.33 (s, 3H), 1.29 (d,  $J = 6.8$  Hz, 3H), 0.88 (s, 9H), 0.05 (s, 3H), 0.04 (s, 3H).

**$^{13}\text{C}$  NMR** (100 MHz,  $\text{CDCl}_3$ )  $\delta$  143.22 (e), 138.12 (e), 133.03 (o), 131.51 (o), 129.45 (o), 128.80 (o), 128.48 (o), 128.33 (o), 127.82 (o), 122.69 (e), 85.44 (e), 84.59 (e), 59.51 (e), 51.03 (o), 33.63 (e), 26.03 (o), 21.58 (o), 20.34 (o), 18.41 (e), -5.12 (o)

**IR** (neat) 3025 (m), 2955 (s), 2929 (s), 2857 (s), 1599 (m), 1491 (m), 1349 (vs), 1165 (vs), 1092 (vs), 838 (vs), 660 (s)  $\text{cm}^{-1}$ .

**HRMS** (CI,  $\text{M}^+$ ) calcd for  $\text{C}_{27}\text{H}_{37}\text{NO}_3\text{SSi}$  483.2263, found 483.2273.

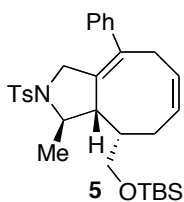

**(*6Z,9Z*)-4-({*tert*-Butyl(dimethyl)silyl}oxy)methyl)-3-methyl-2-[(4-methylphenyl)sulfonyl]-9-phenyl-2,3,3a,4,5,8-hexahydro-1*H*-cycloocta[*c*]pyrrole **5**.**

**$^1\text{H}$  NMR** (400 MHz,  $\text{C}_6\text{D}_6$ )  $\delta$  7.62 (d,  $J = 7.9$  Hz, 2H), 7.07 (t,  $J = 7.3$  Hz, 2H), 7.02-6.95 (m, 3H), 6.67 (d,  $J = 7.9$  Hz, 2H), 5.80-5.74 (m, 1H), 5.68-5.62 (m, 1H), 4.02 (d, A of AB,  $J_{AB} = 13.7$  Hz, 1H), 3.94 (d, B of AB,  $J_{AB} = 13.7$  Hz, 1H), 3.73 (dq,  $J = 9.8, 3.8$  Hz, 1H), 3.66 (dd,  $J = 9.5, 4.0$  Hz, 1H), 3.54 (t,  $J = 10.4$  Hz, 1H), 3.18 (dd, A of ABX,  $J_{AB} = 13.6$  Hz,  $J_{AX} = 9.1$  Hz, 1H), 2.99 (bs, 1H), 2.67-2.56 (m, 2H), 2.42

(dd, B of ABX,  $J_{AB} = 14.0$  Hz,  $J_{BX} = 6.3$  Hz, 1H), 1.97-1.93 (m, 1H), 1.86 (s, 3H), 1.28 (d,  $J = 6.1$  Hz, 3H), 0.99 (s, 9H), 0.07 (s, 3H), 0.06 (s, 3H).

**$^{13}\text{C}$  NMR** (100 MHz,  $\text{C}_6\text{D}_6$ )  $\delta$  142.77 (e), 138.16 (e), 136.14 (e), 132.04 (o), 131.60 (e), 129.69 (o), 128.93 (o), 128.41 (e), 128.35 (o), 127.96 (o), 127.54 (o), 127.40 (o), 62.43 (o), 61.81 (e), 53.24 (e), 42.91 (o), 35.79 (e), 30.43 (e), 26.16 (o), 21.85 (o), 21.18 (o), 18.44 (e), -5.15 (o), -5.35 (o).

**IR** (Neat): 3024 (s), 2929 (s), 2858 (s), 1752 (m), 1647 (w), 1599 (s), 1494 (s), 1462 (s), 1347 (vs), 1254 (s), 1163 (vs), 1094 (s), 838 (vs), 758 (vs), 593 (s)  $\text{cm}^{-1}$ .

**HRMS** (FAB,  $\text{M}+\text{H}^+$ ): calcd for  $\text{C}_{31}\text{H}_{44}\text{NO}_3\text{SSi}$  538.2811, found 538.2819.

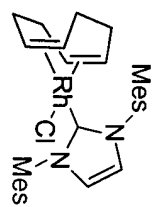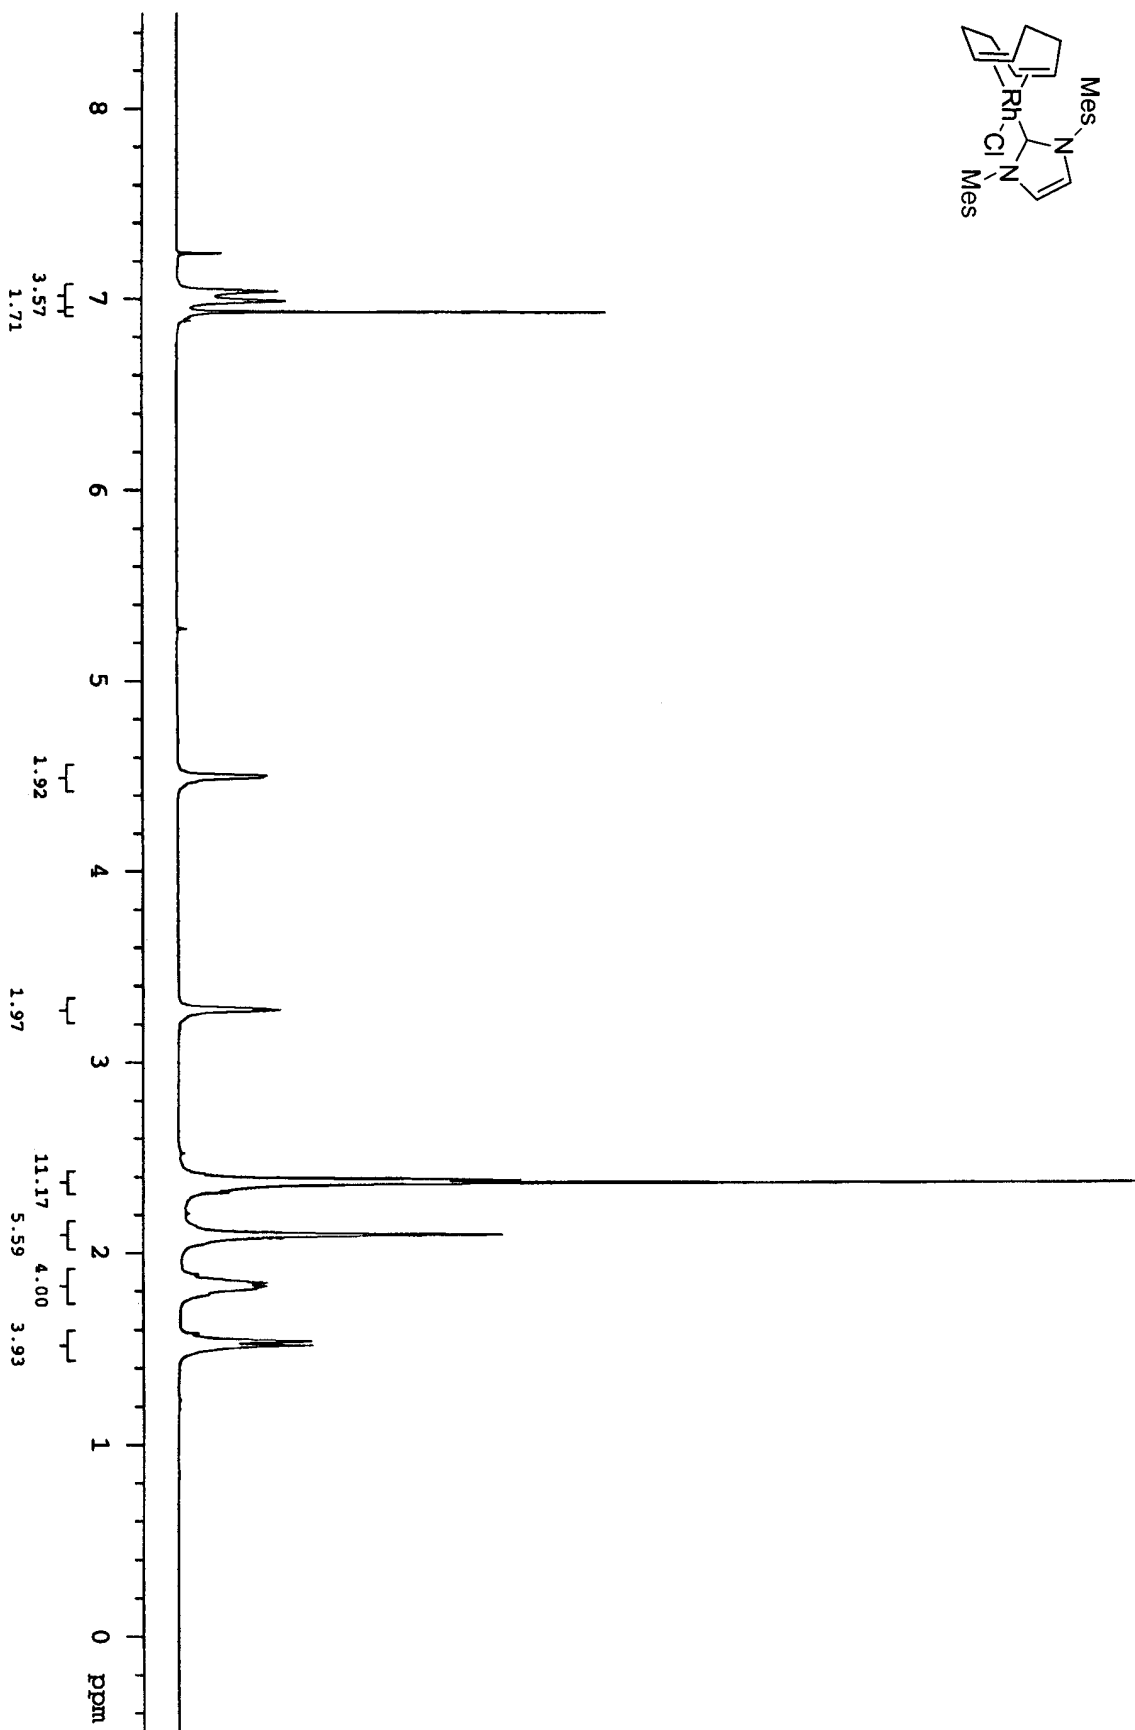



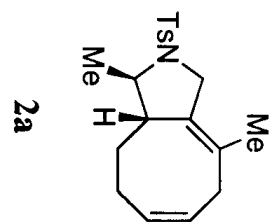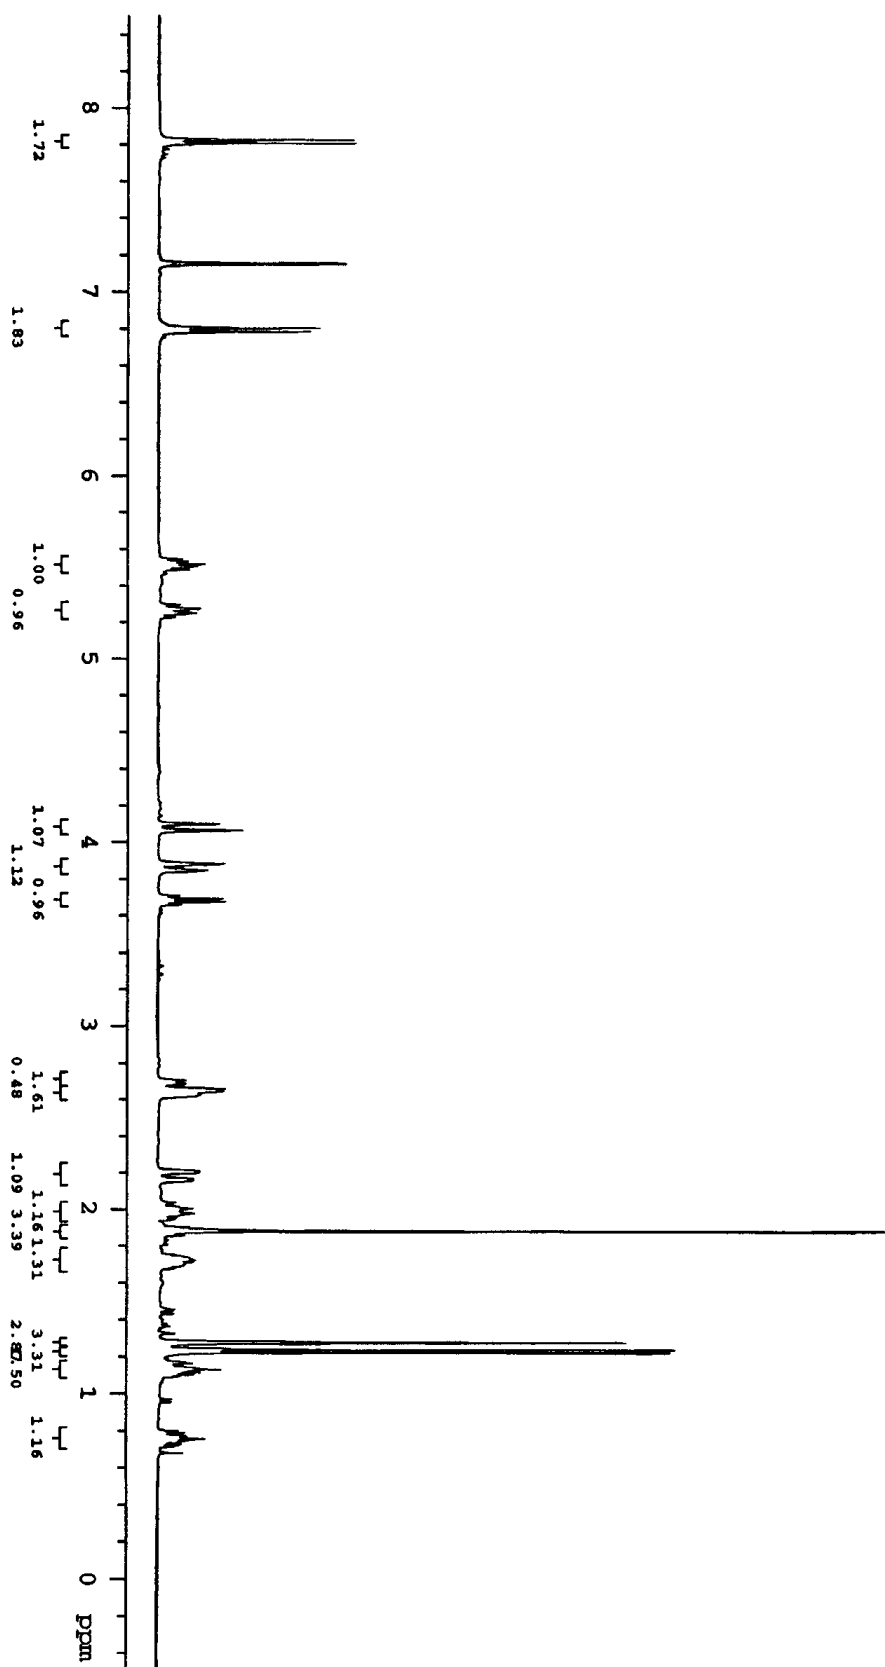

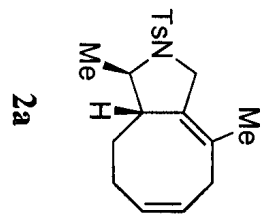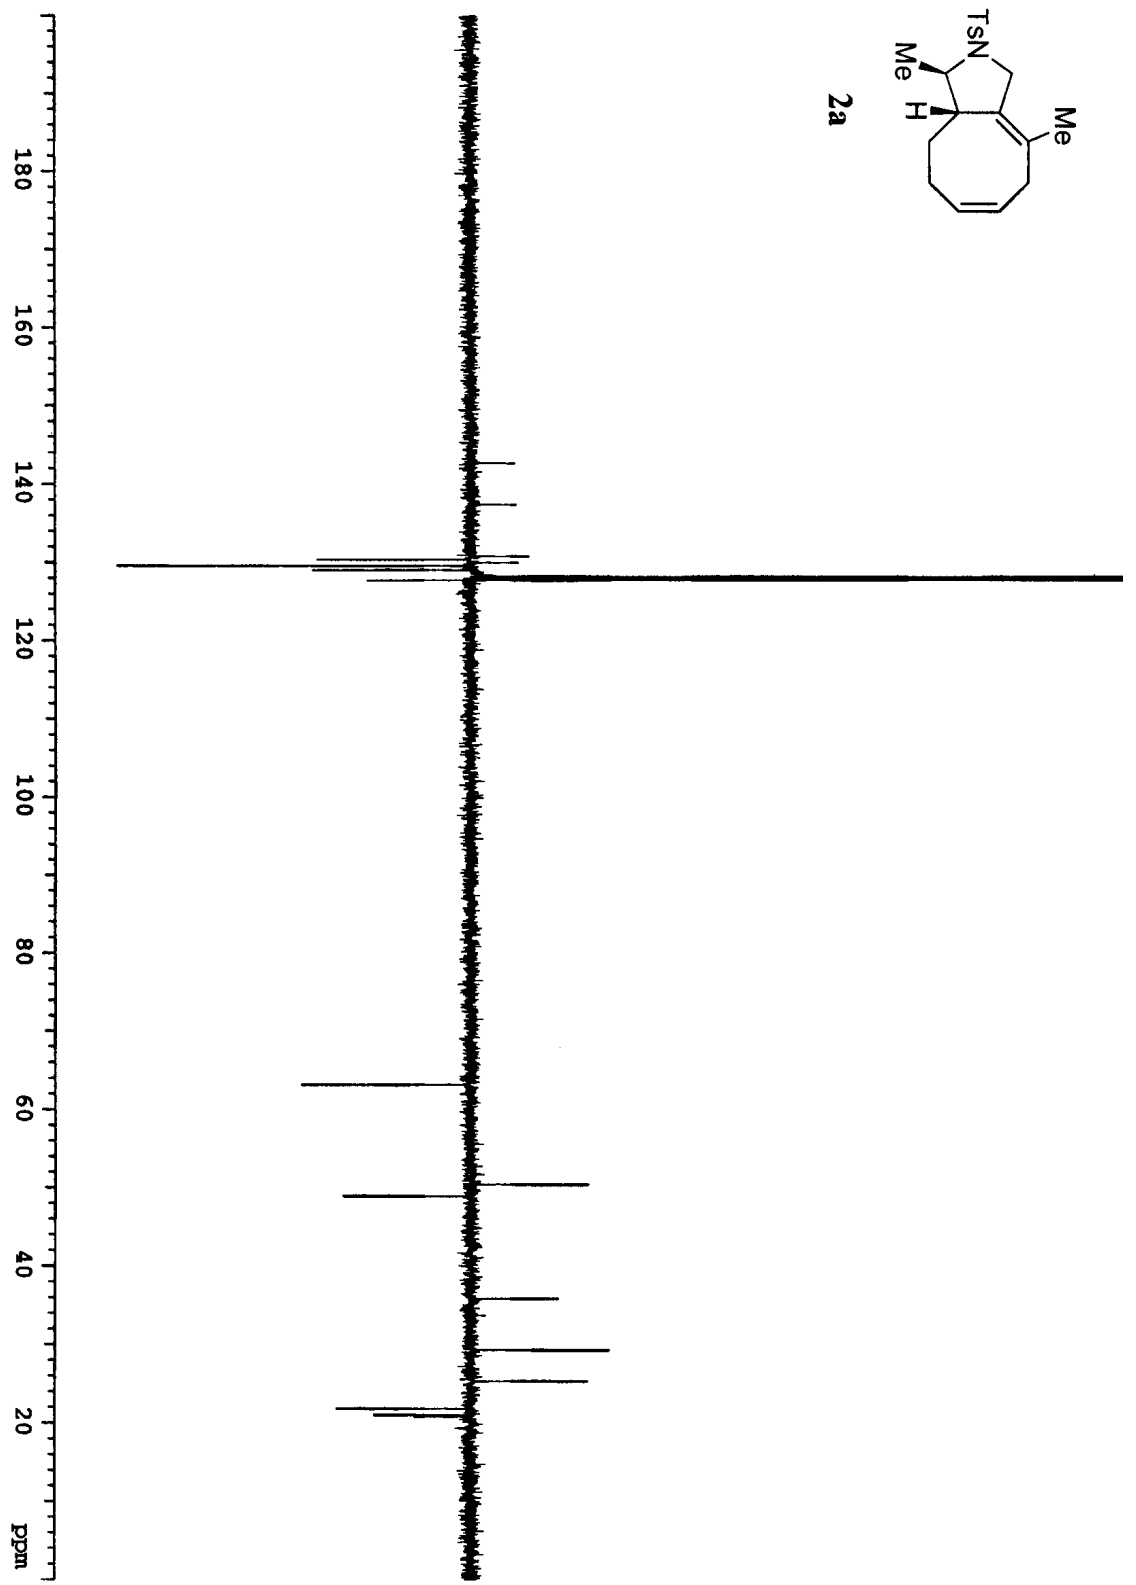

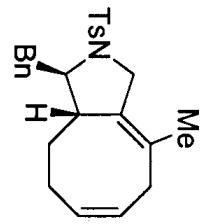

2b

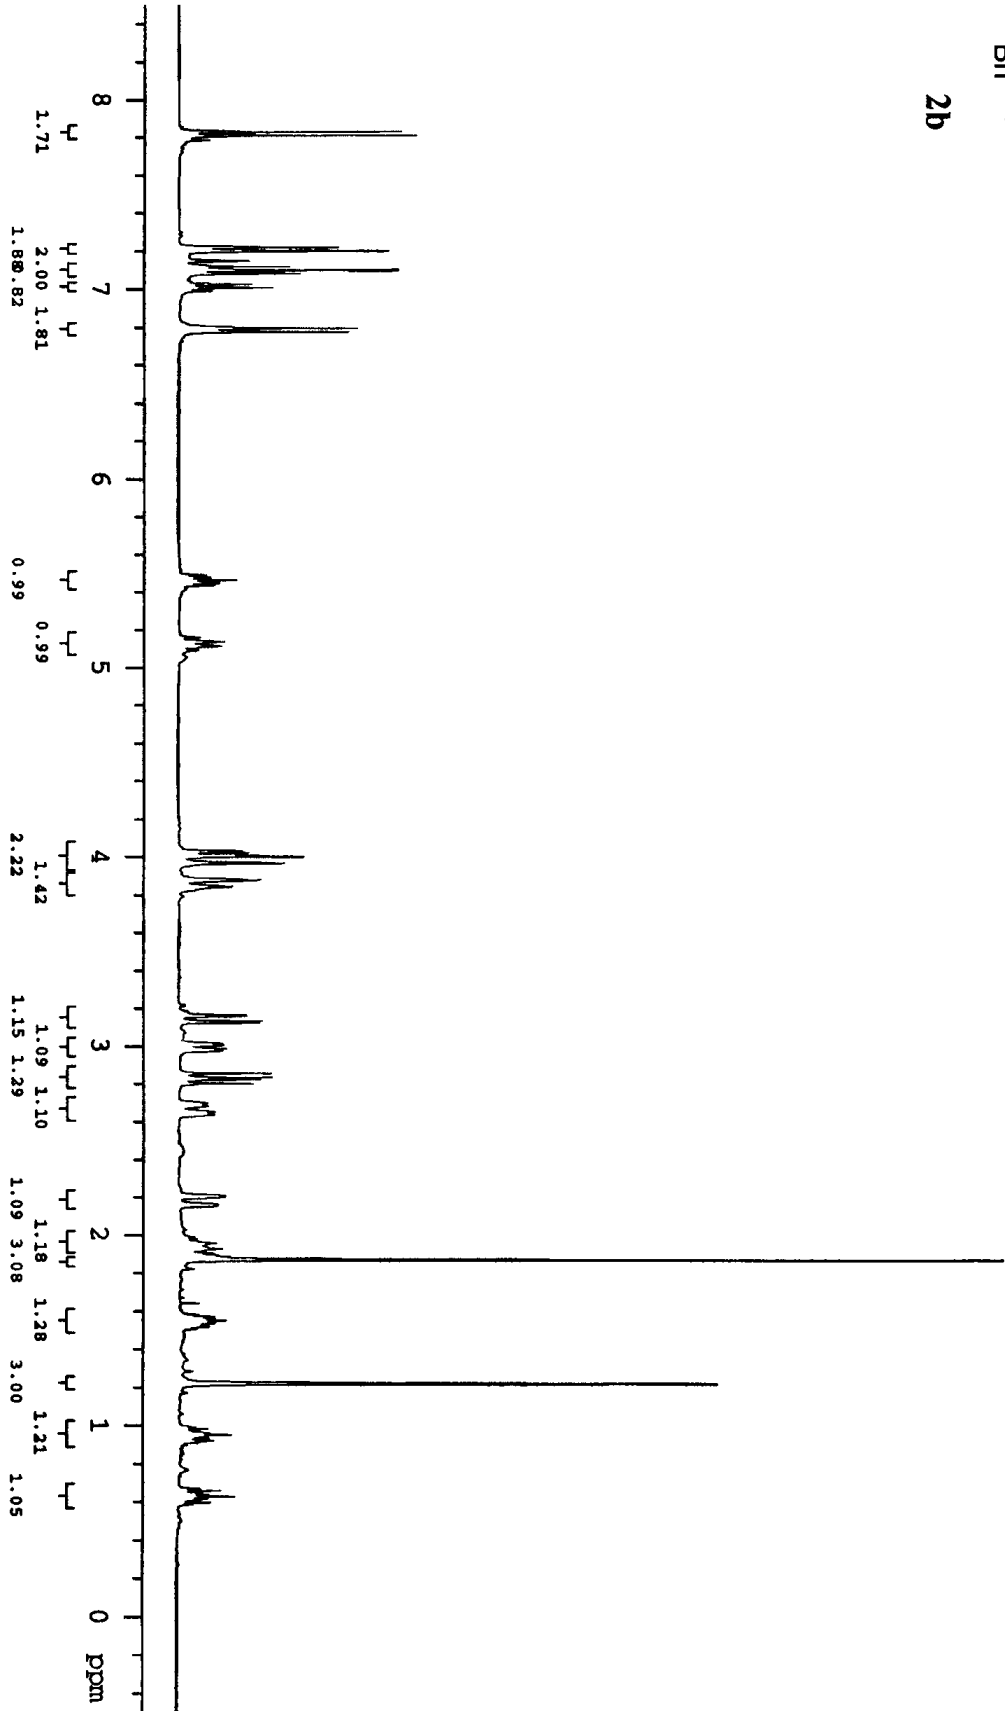

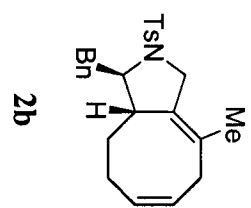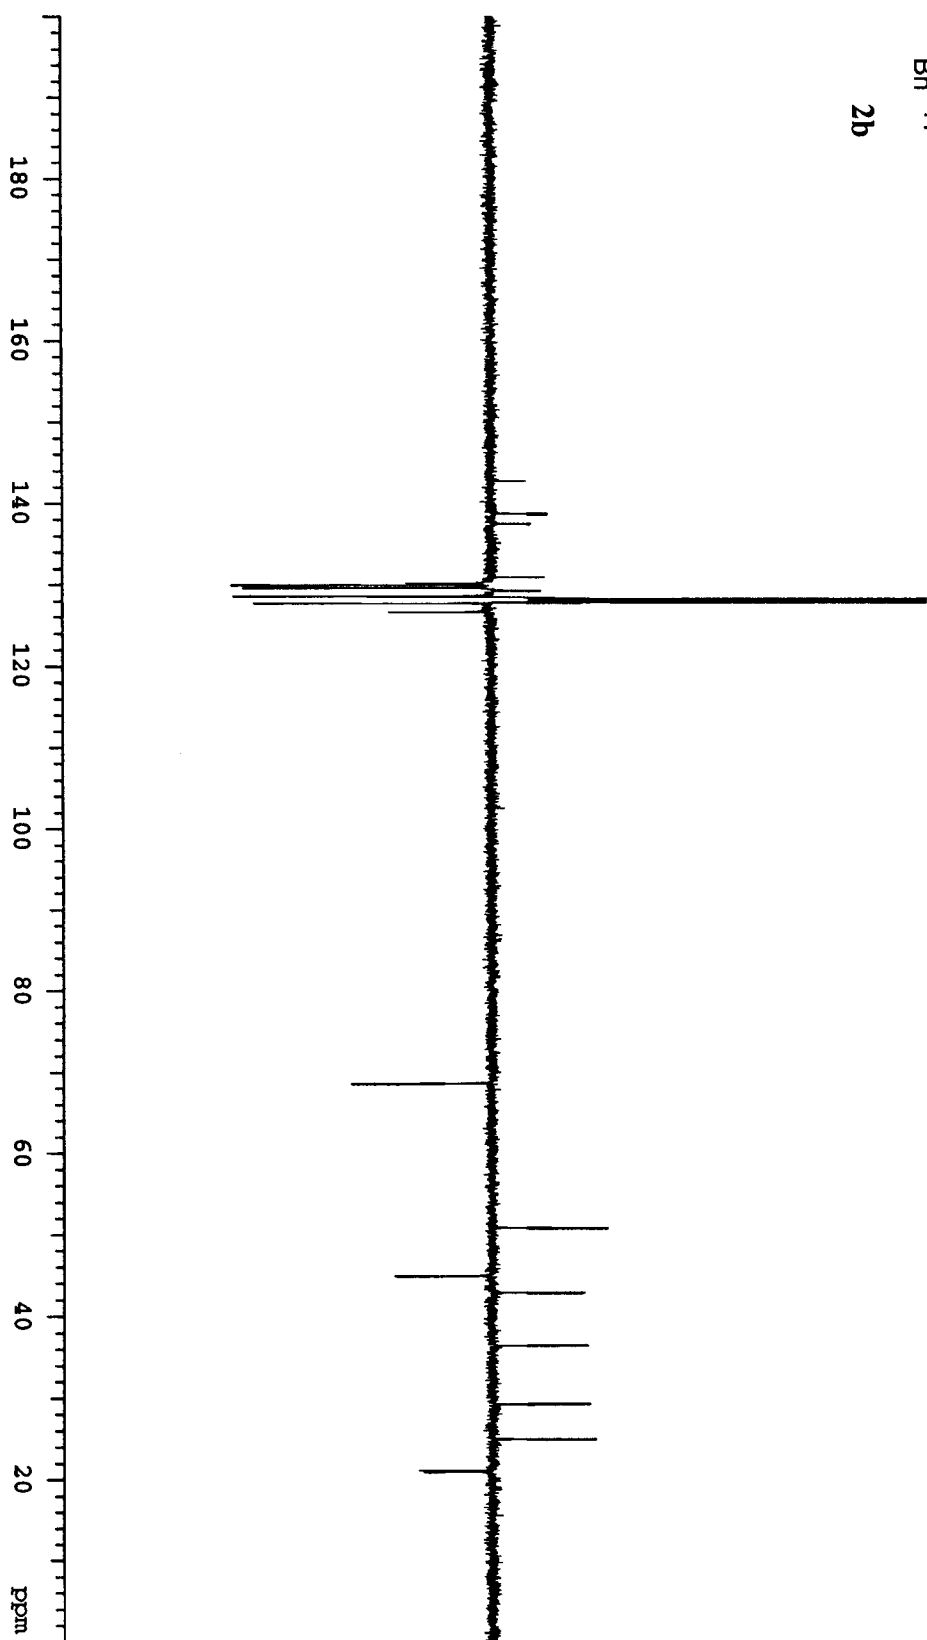



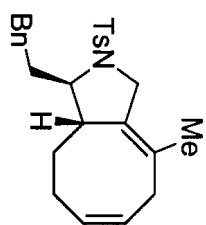

2c

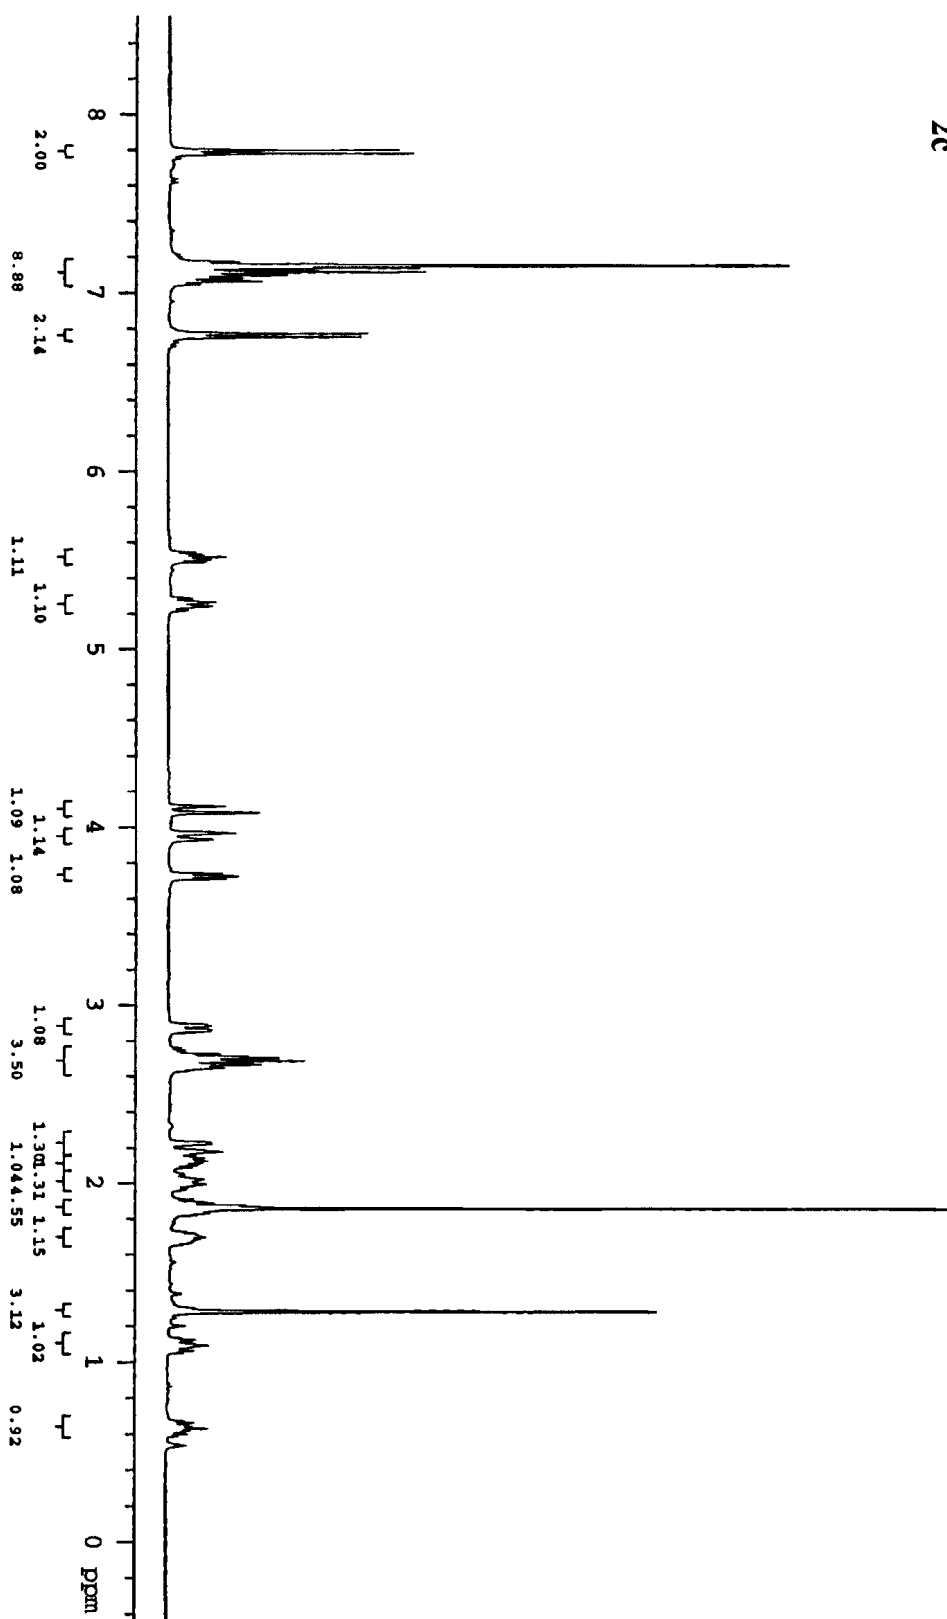

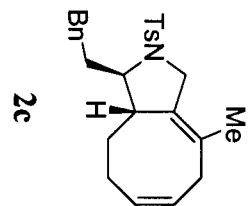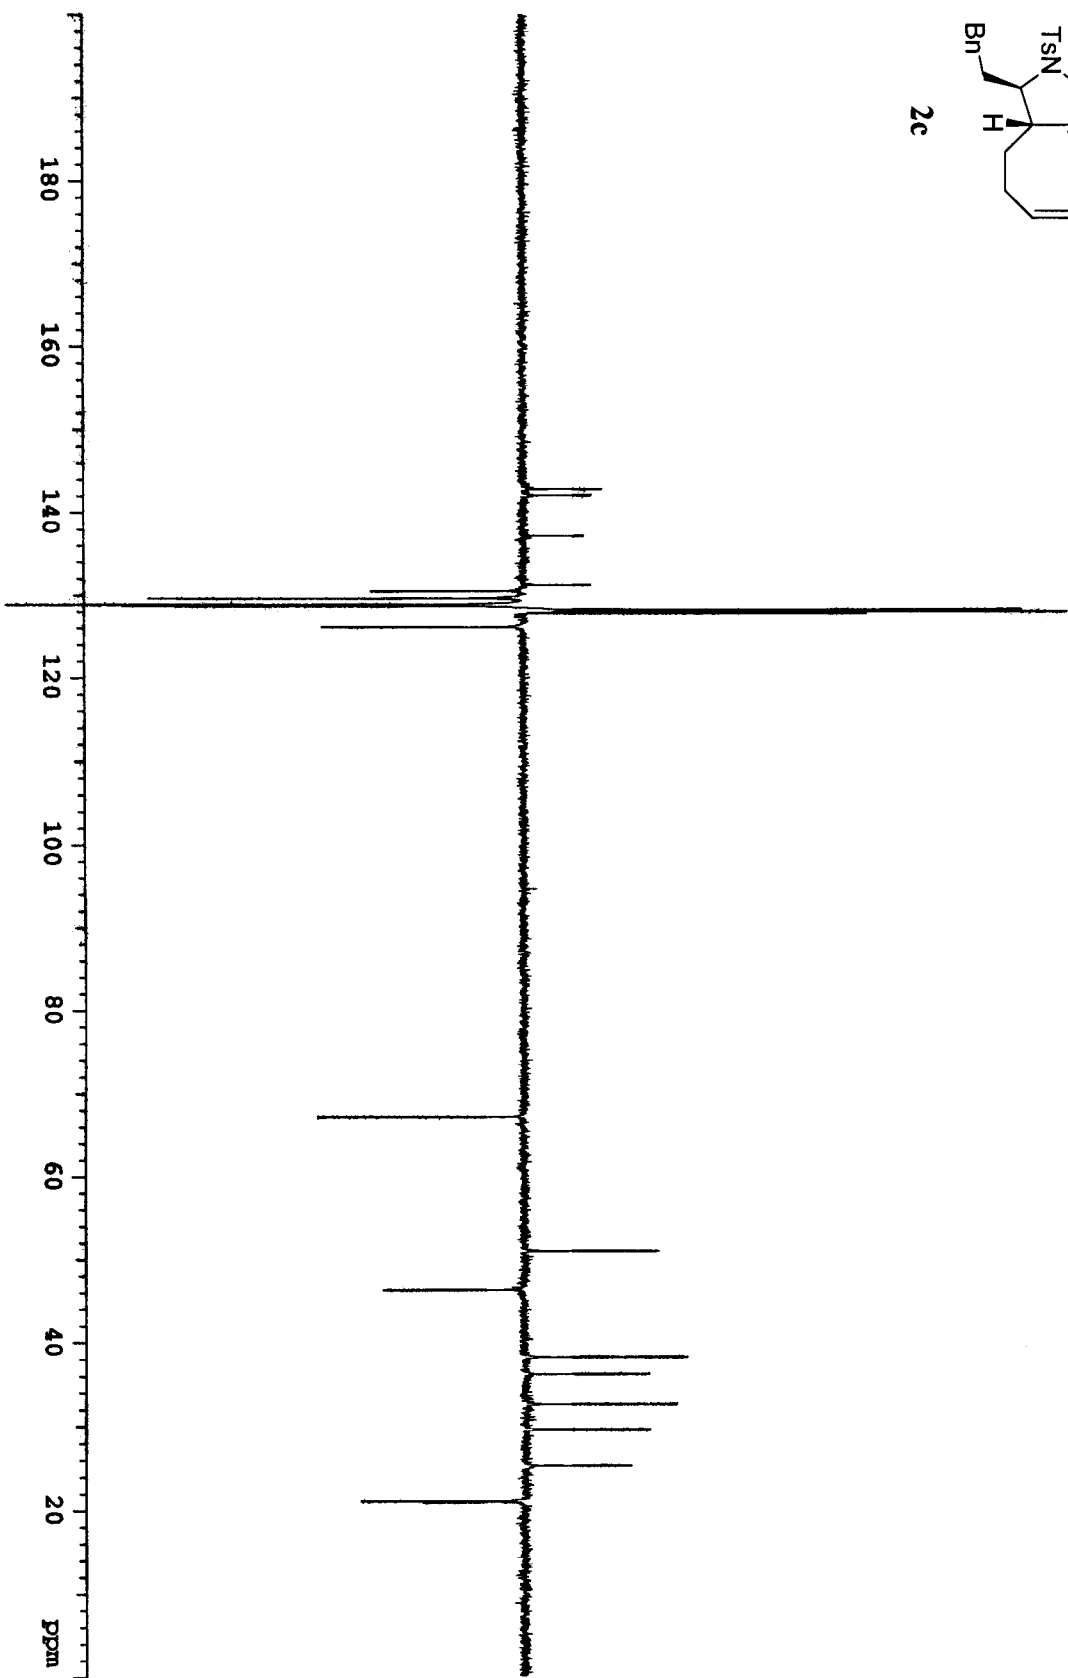

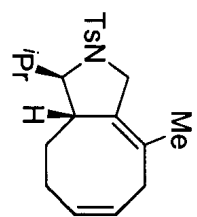

2d

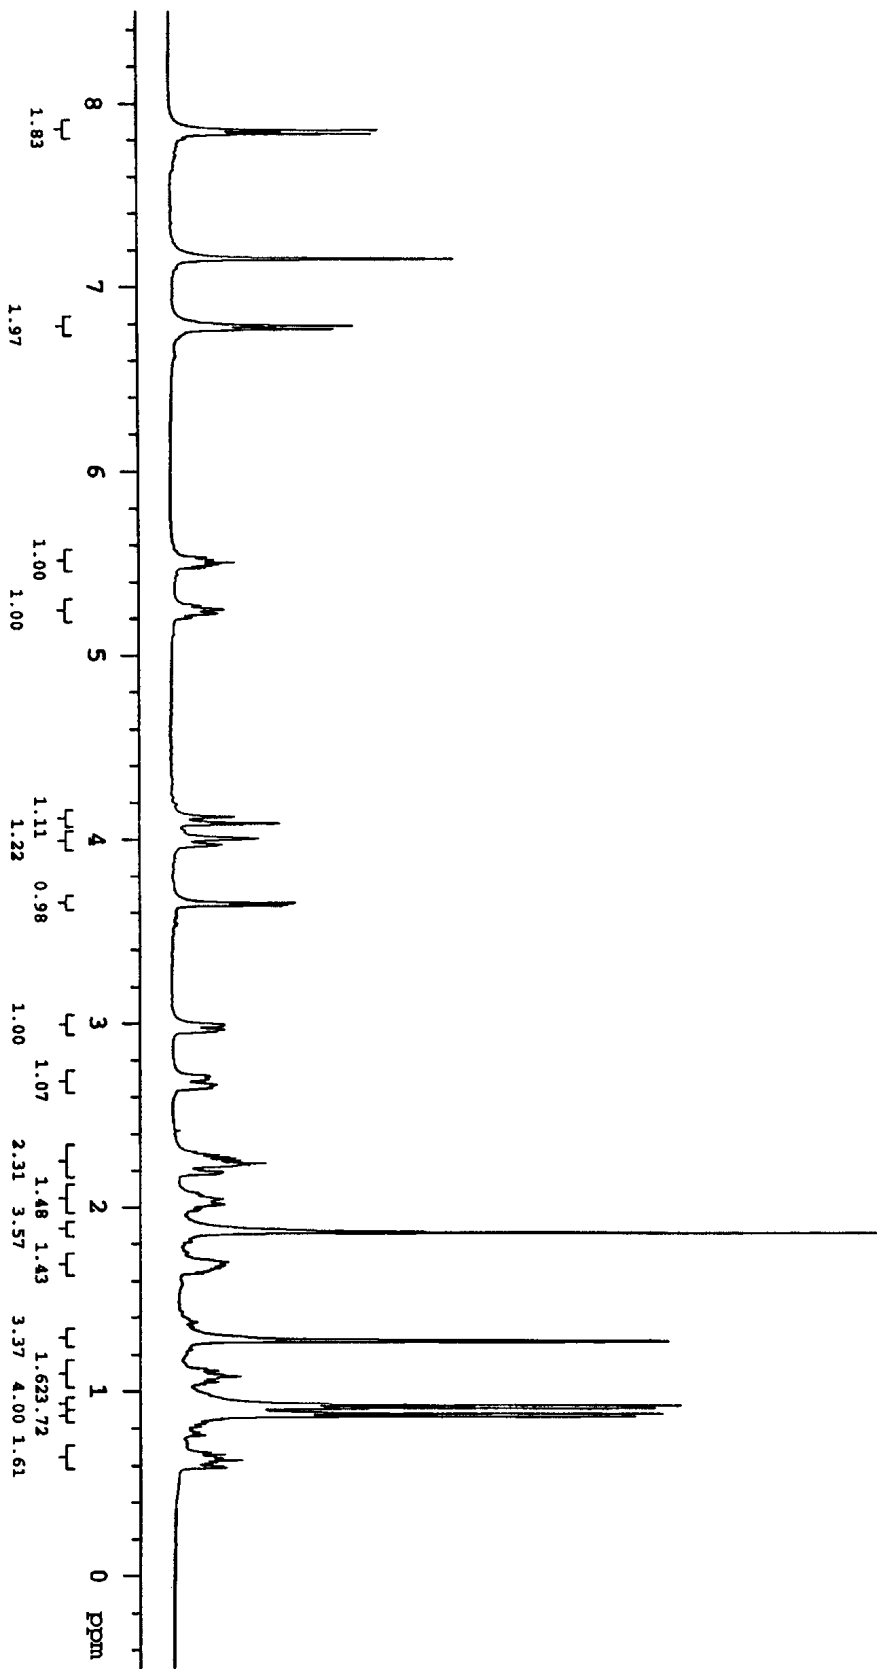

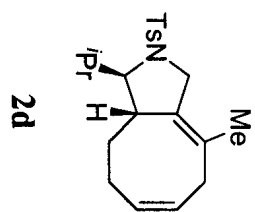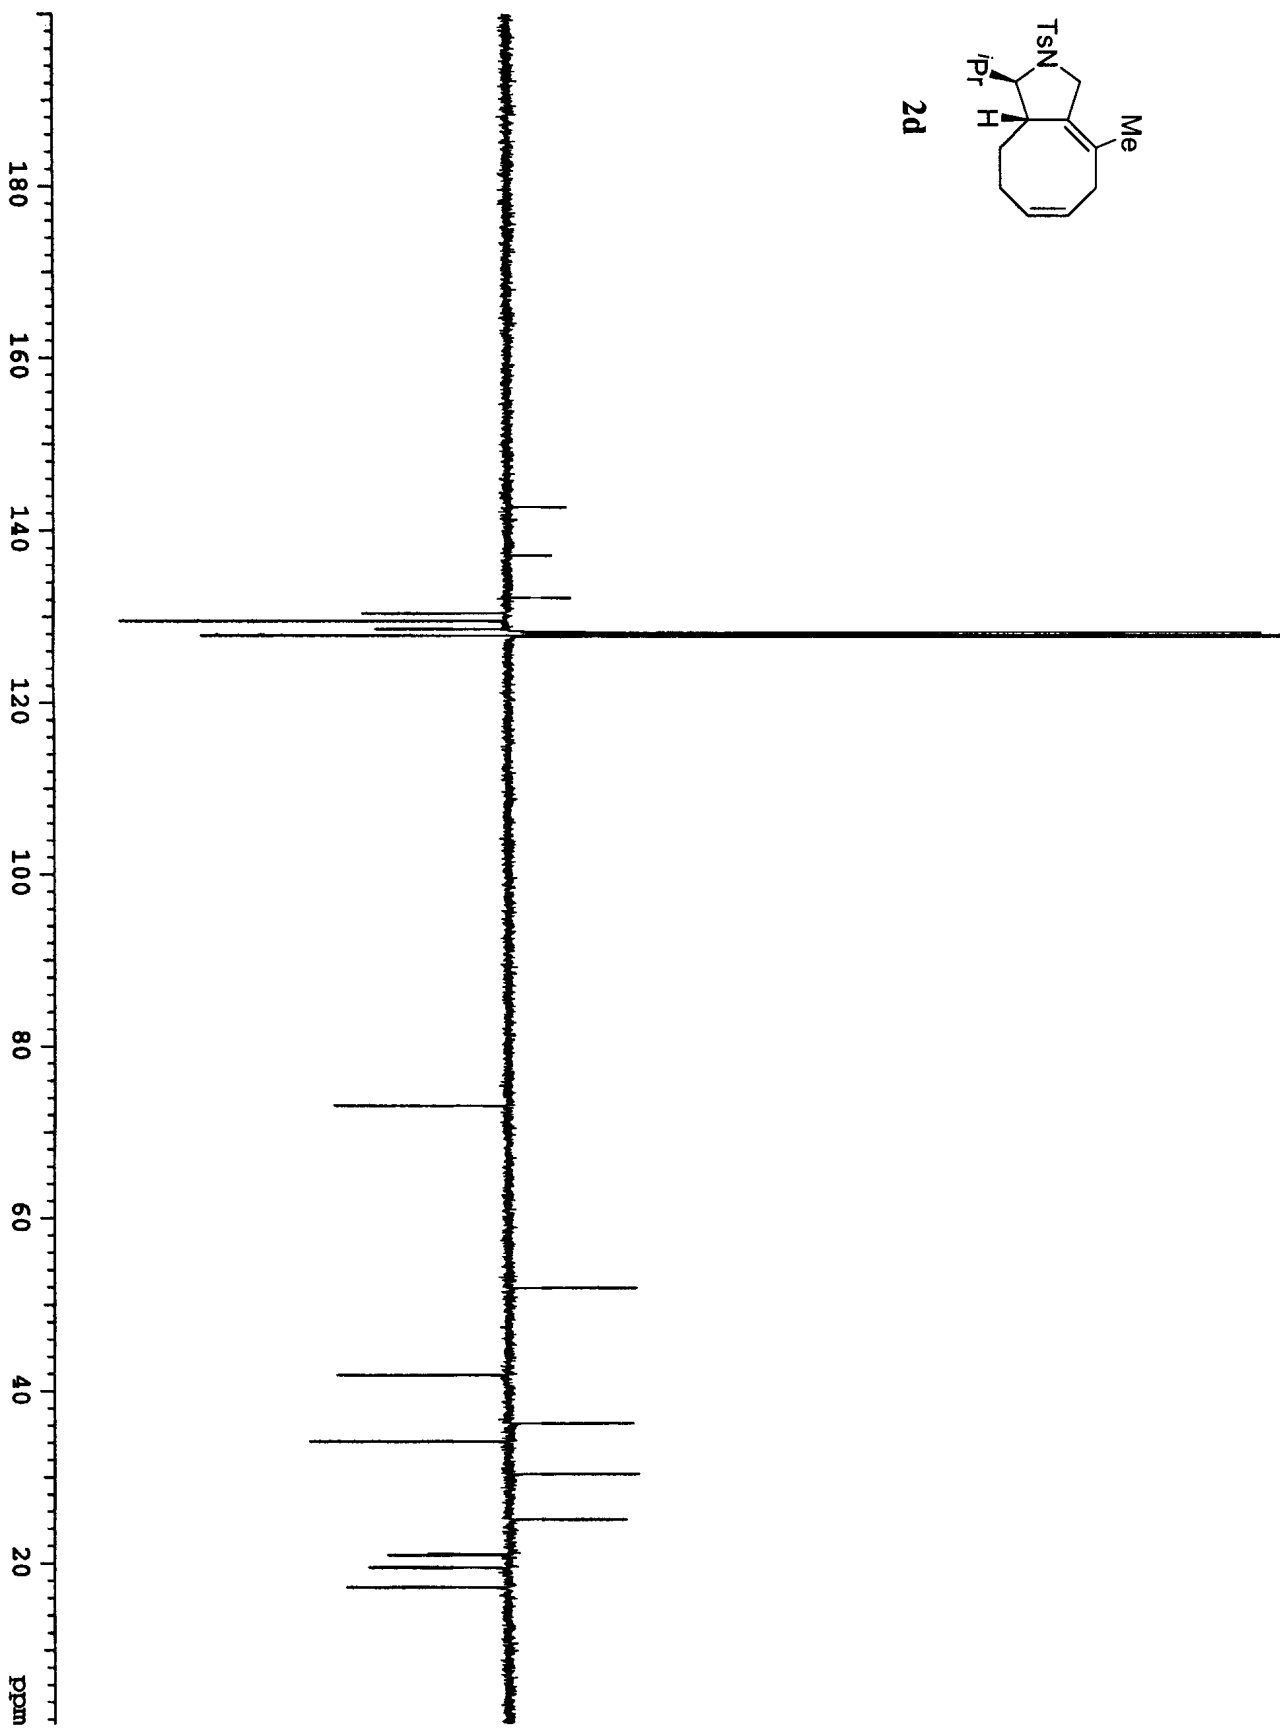

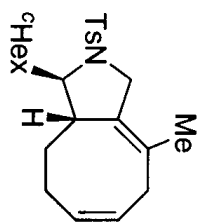

2e

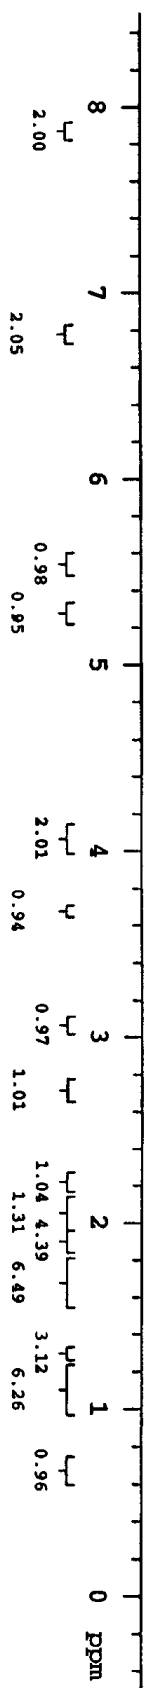

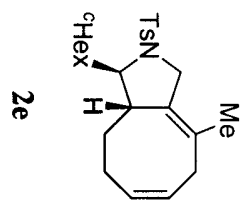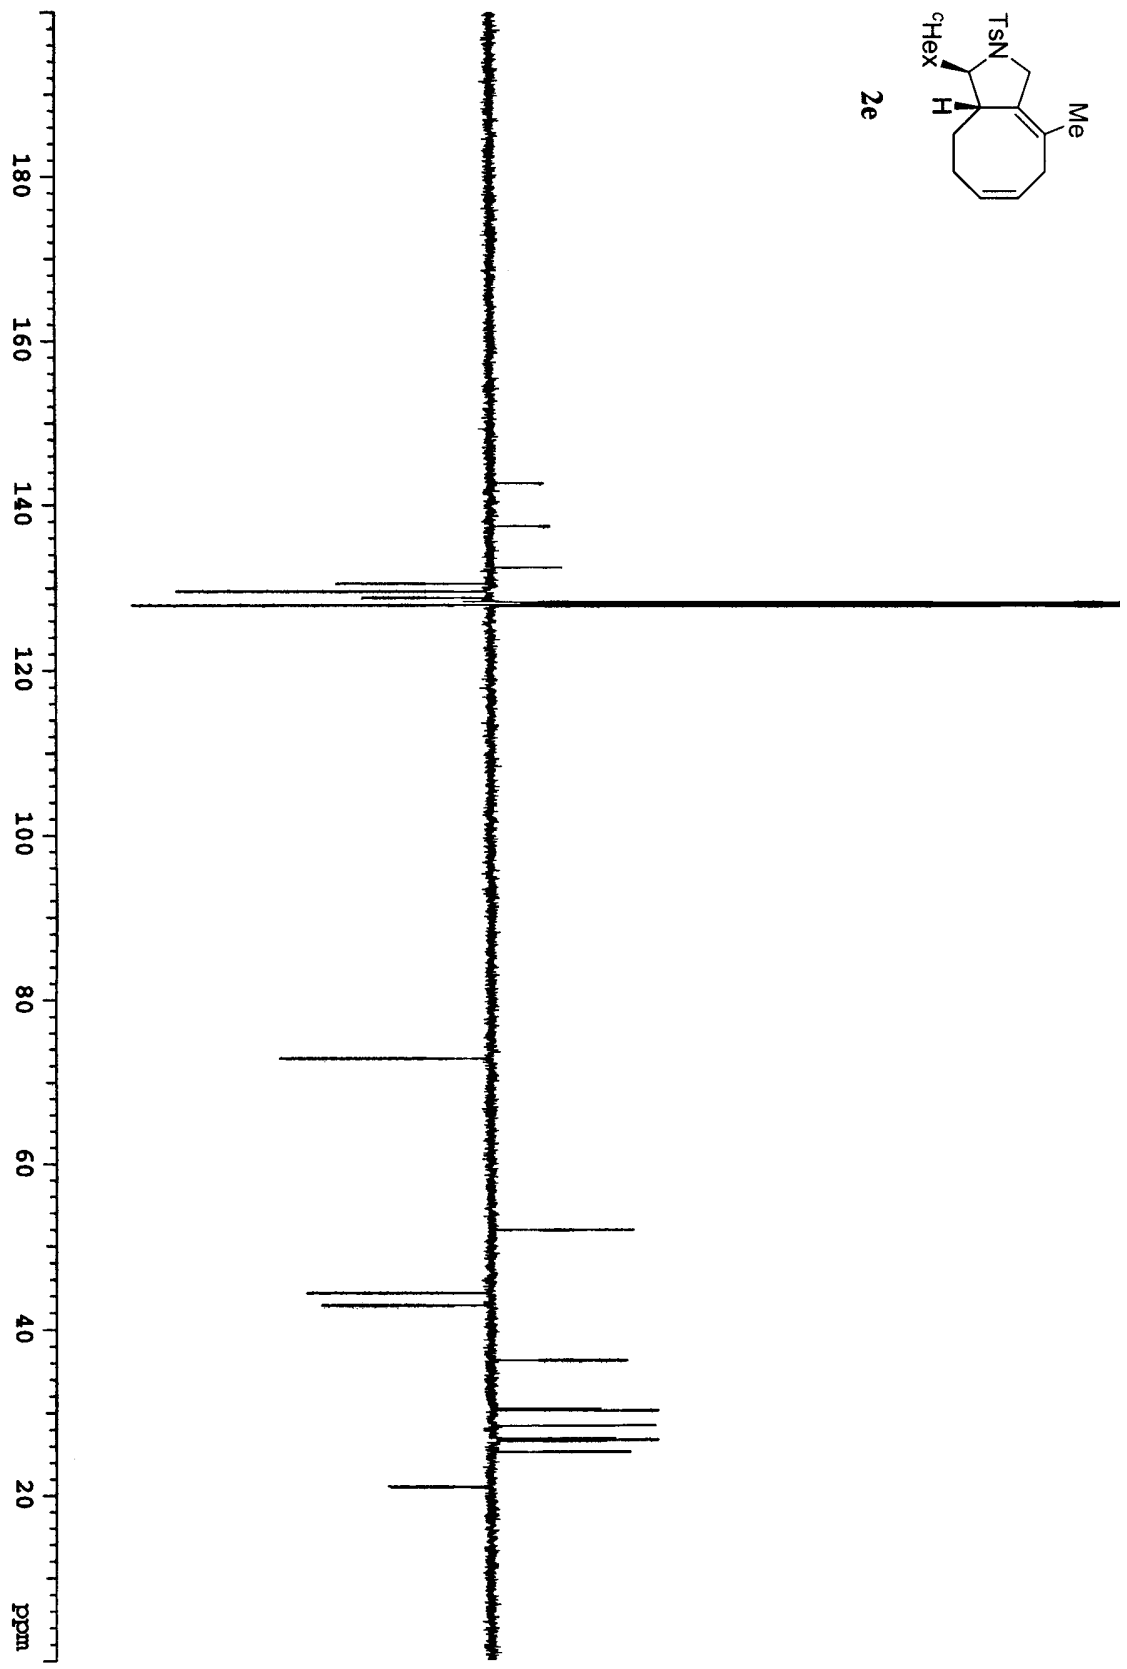

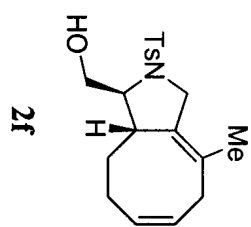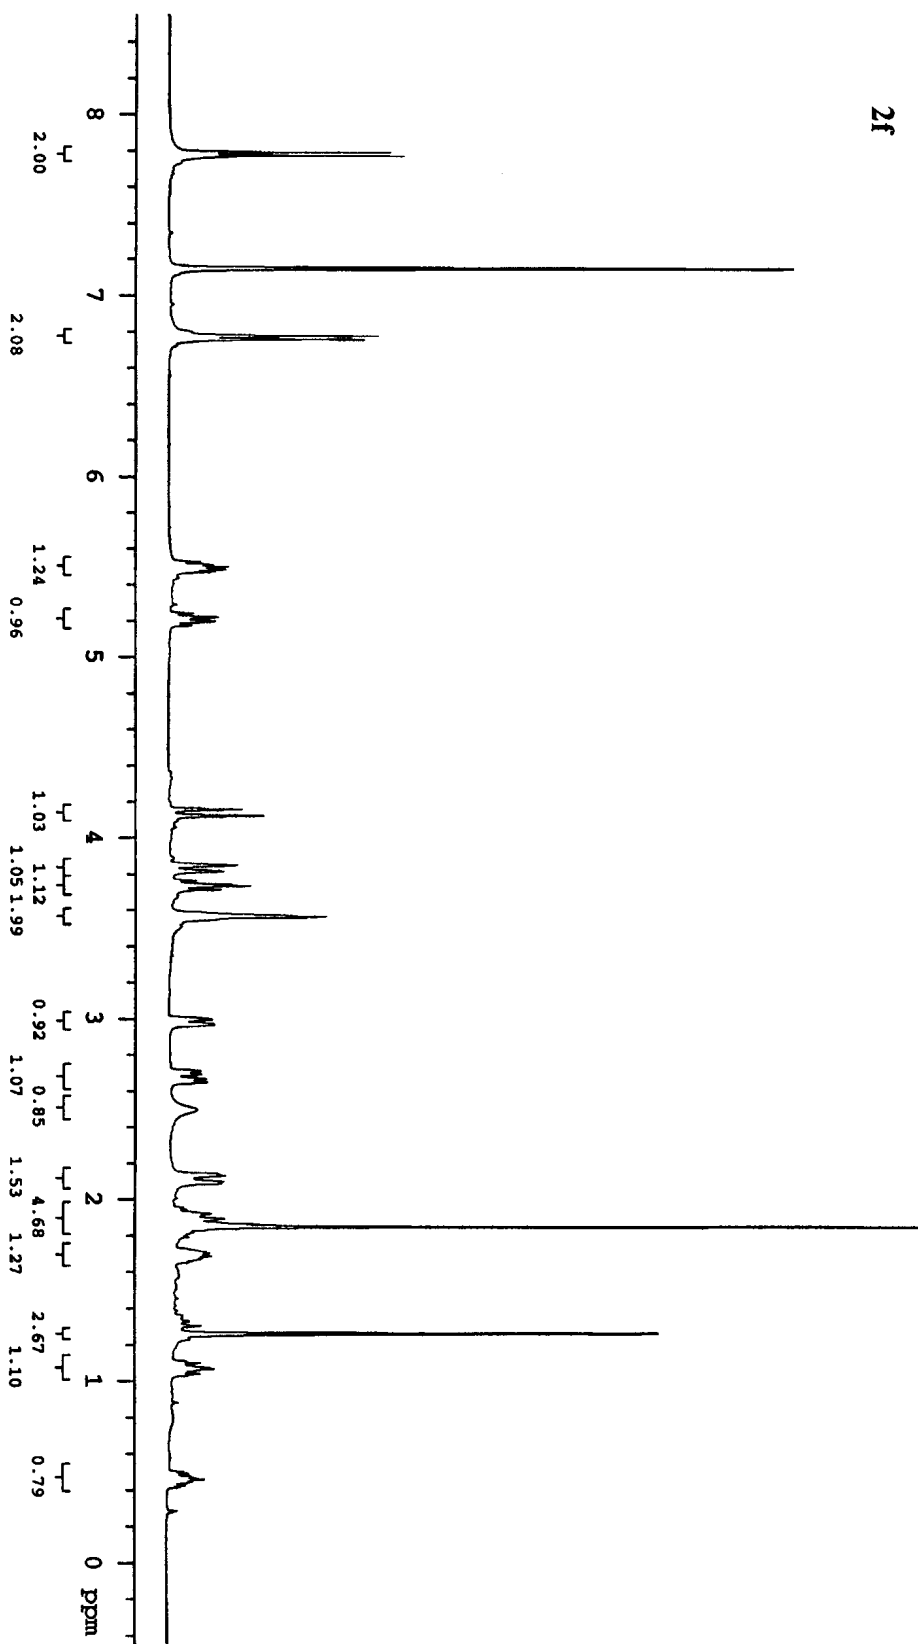

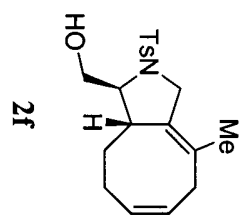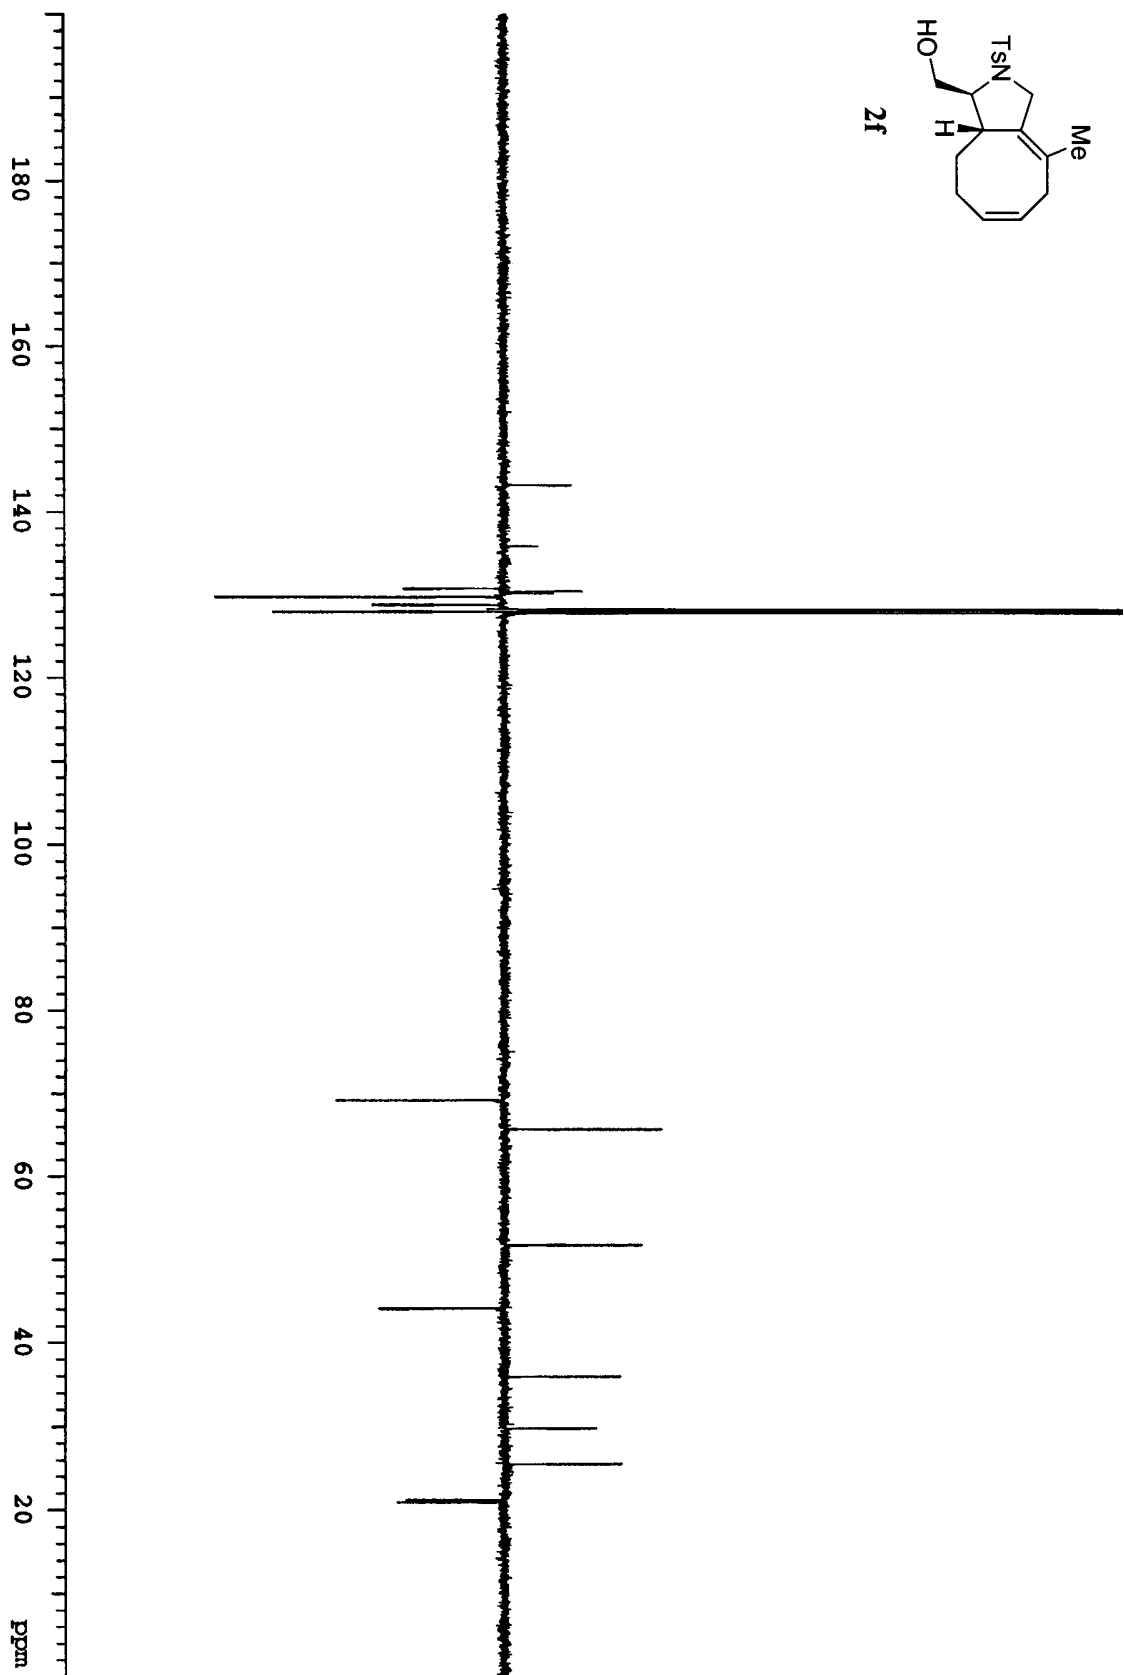



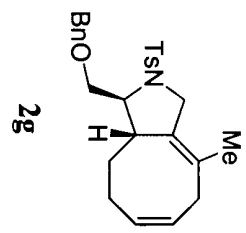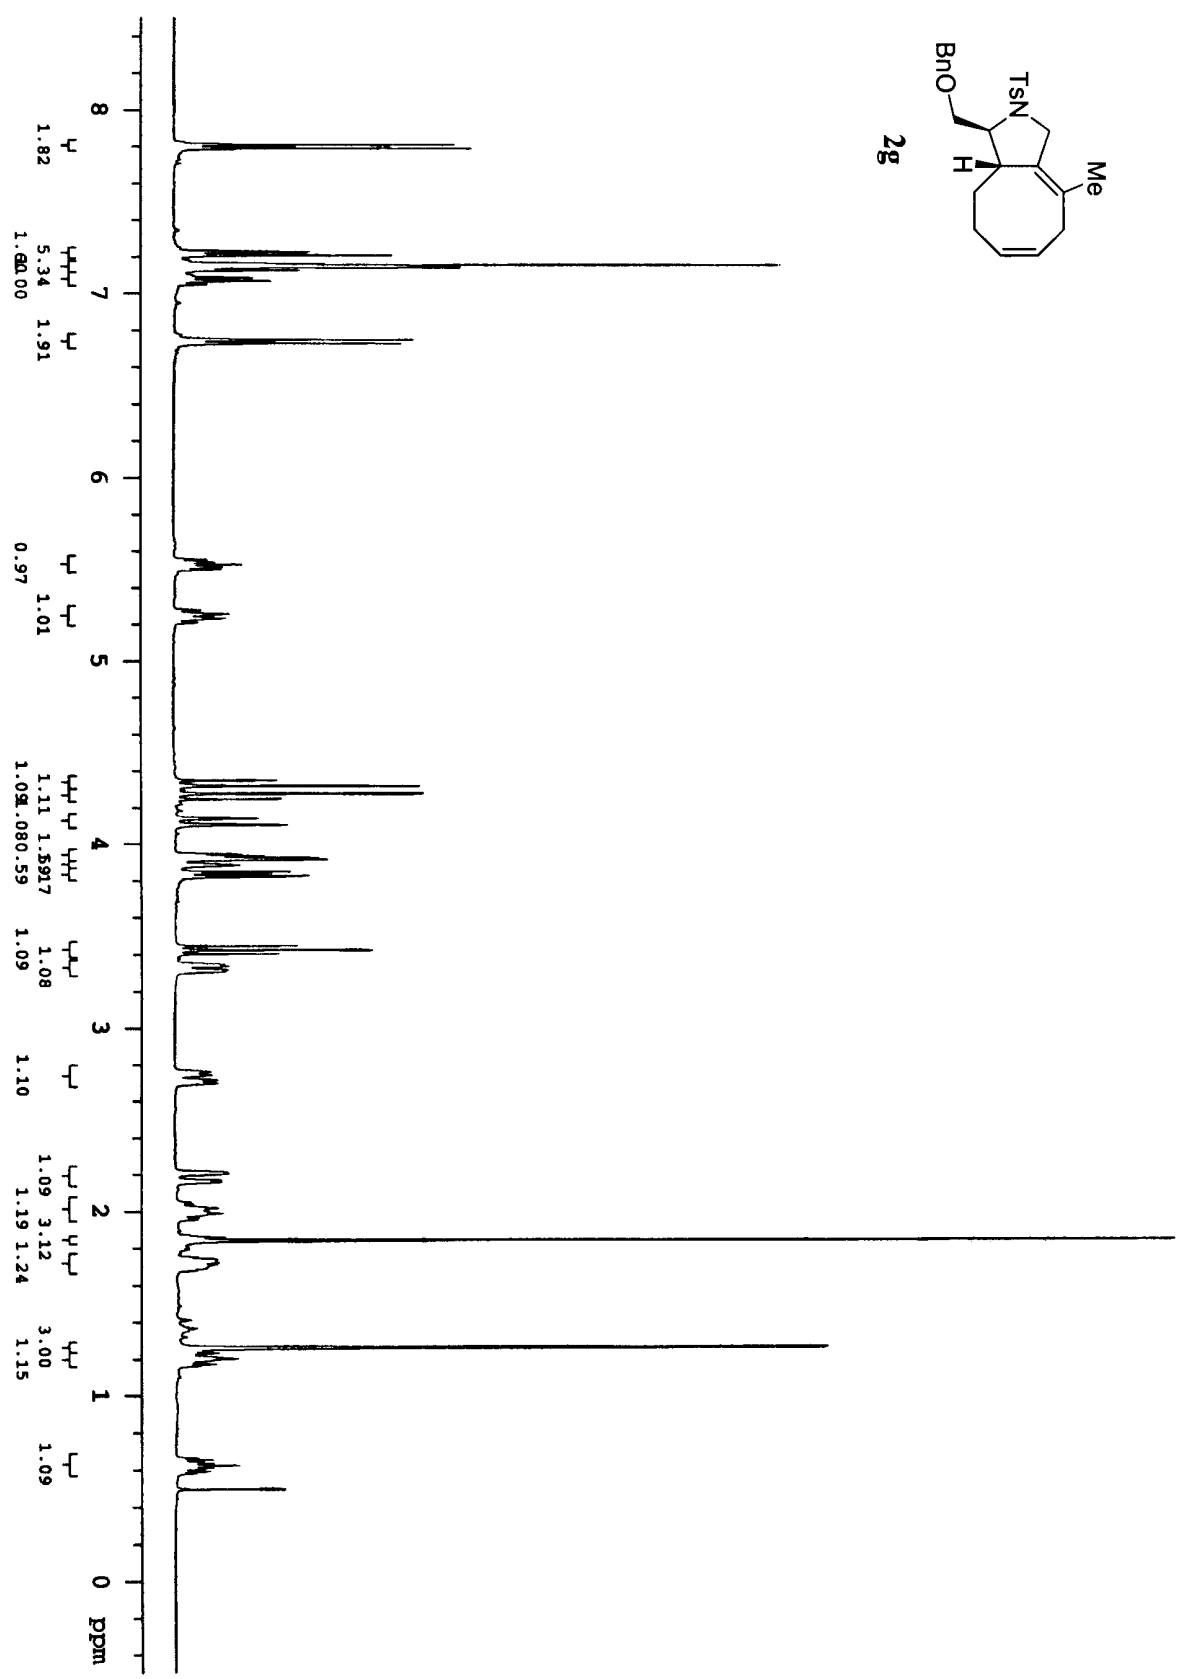

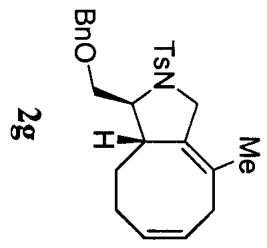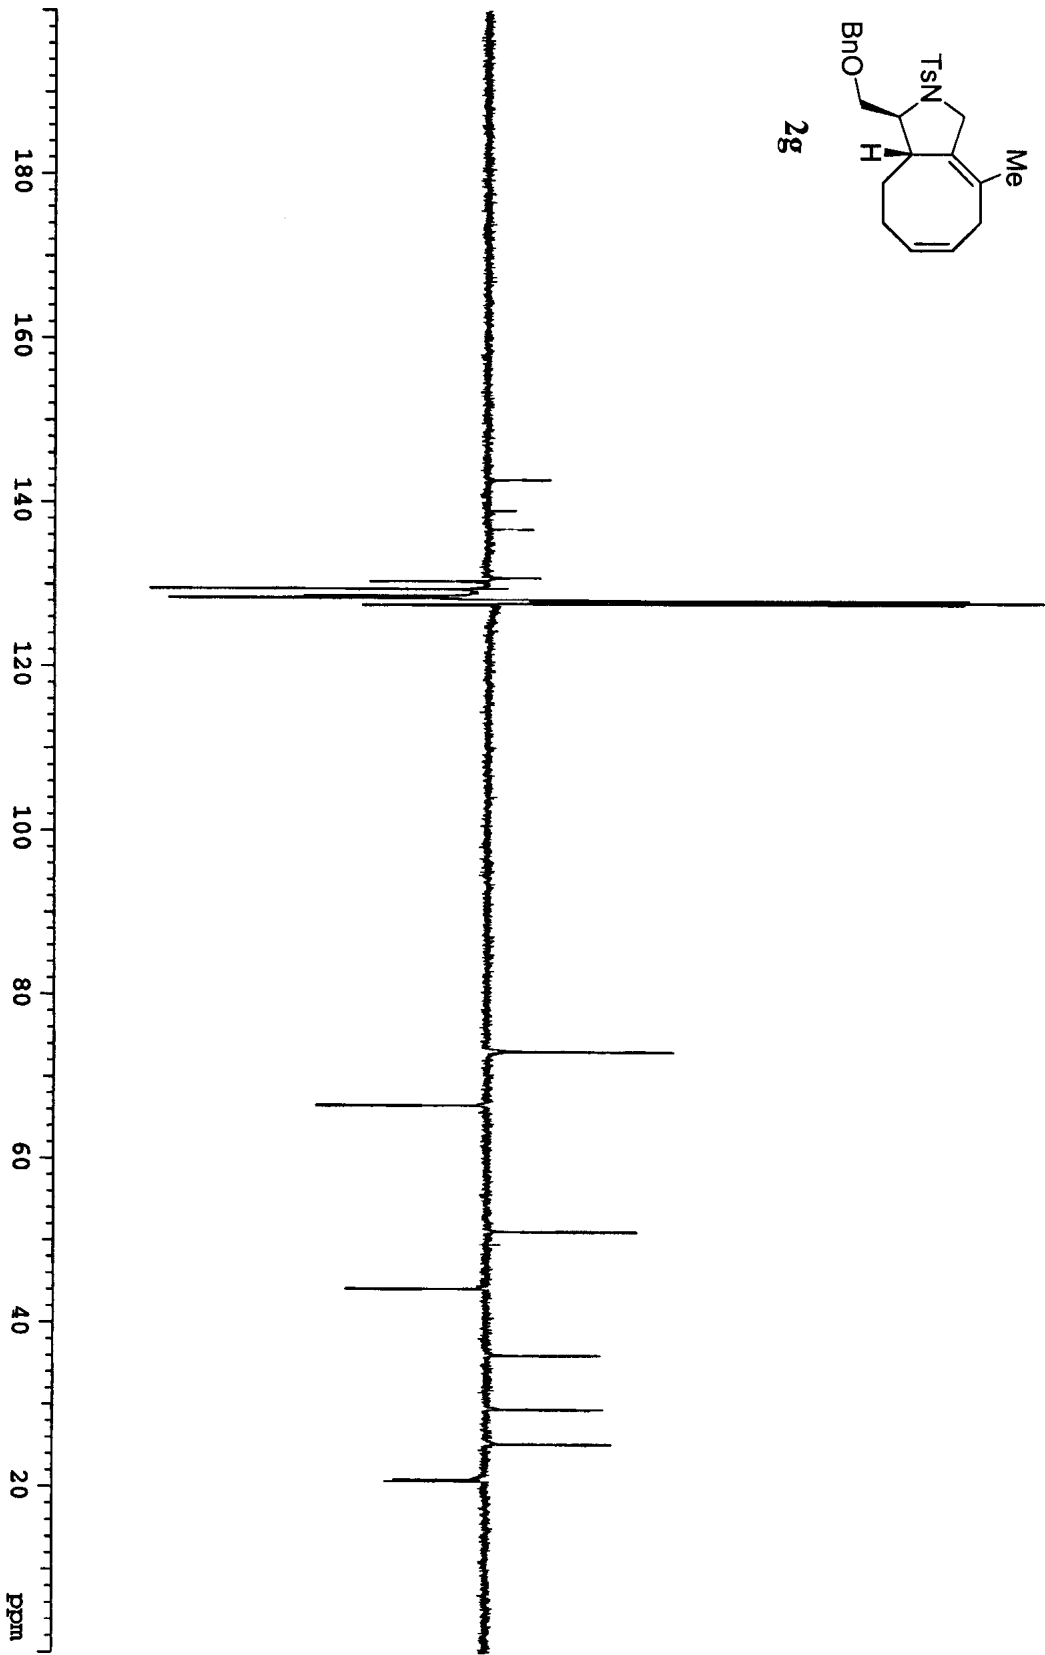



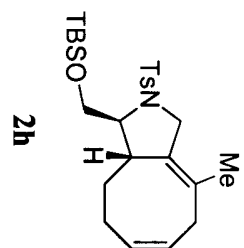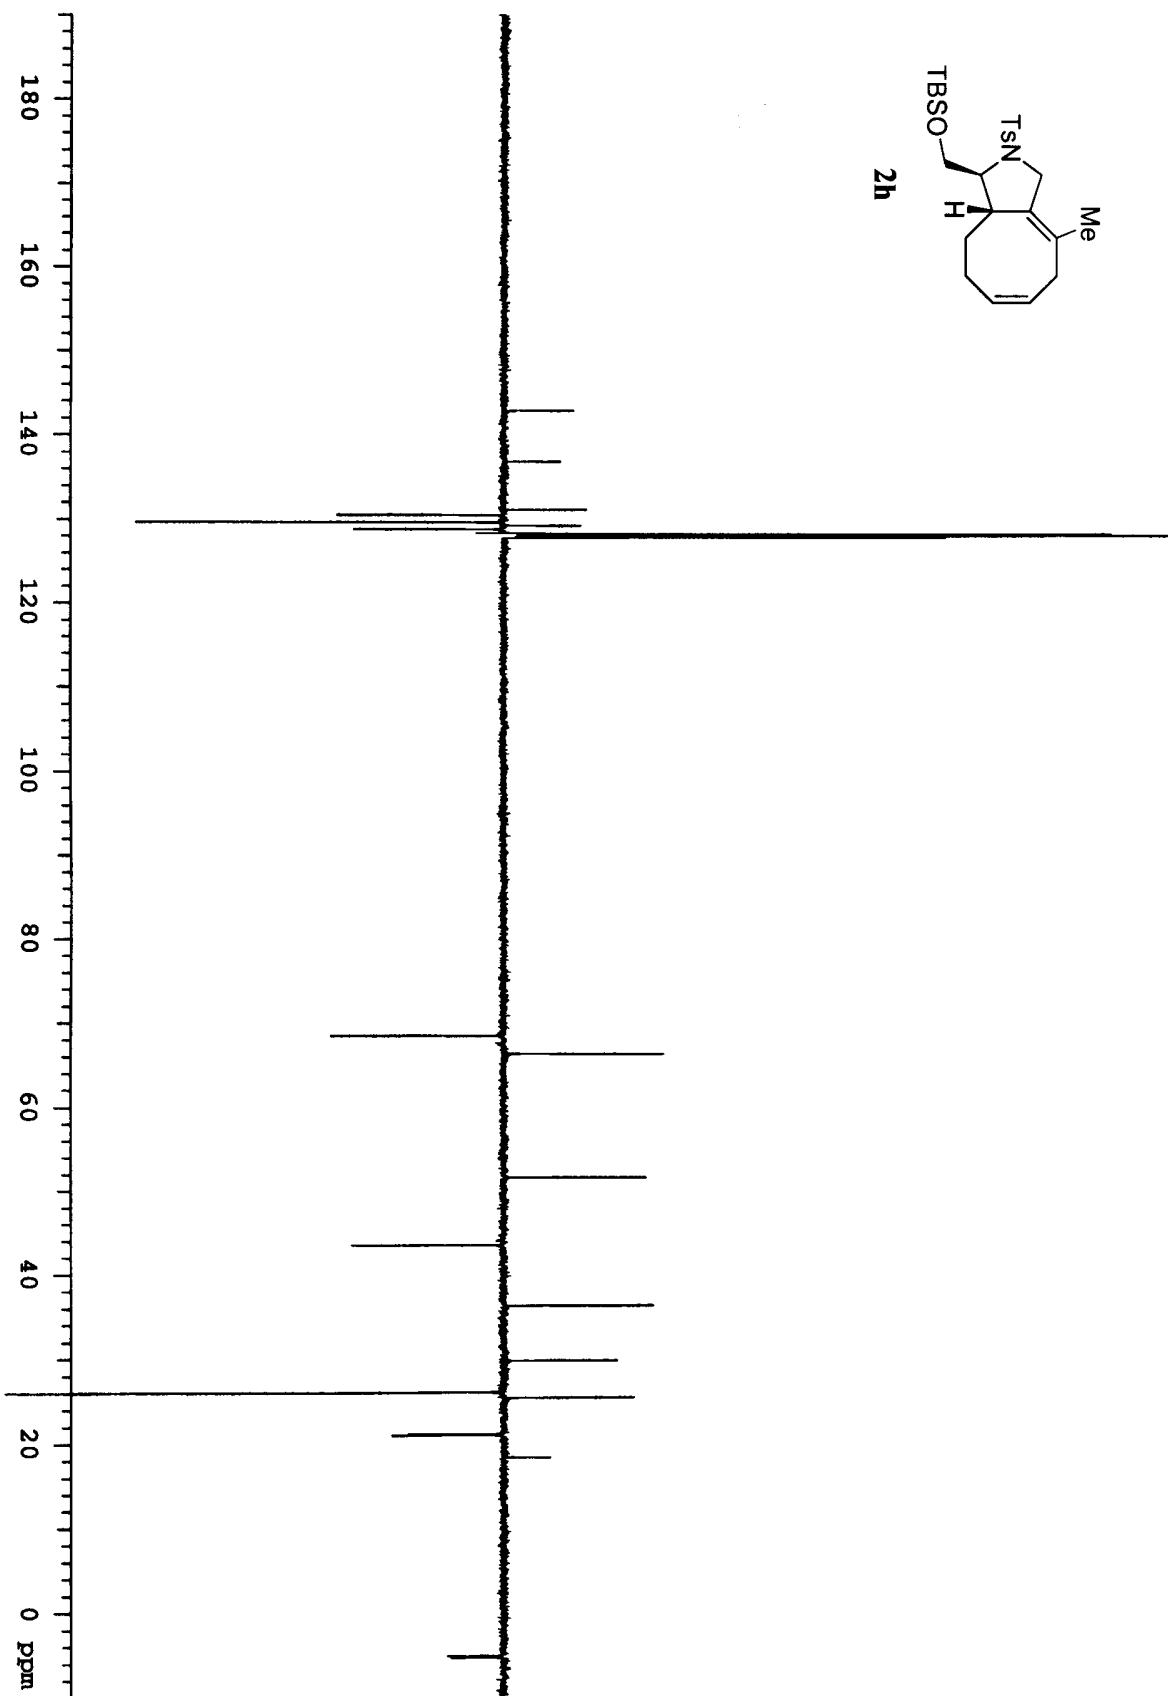

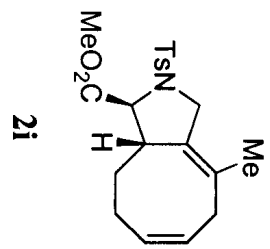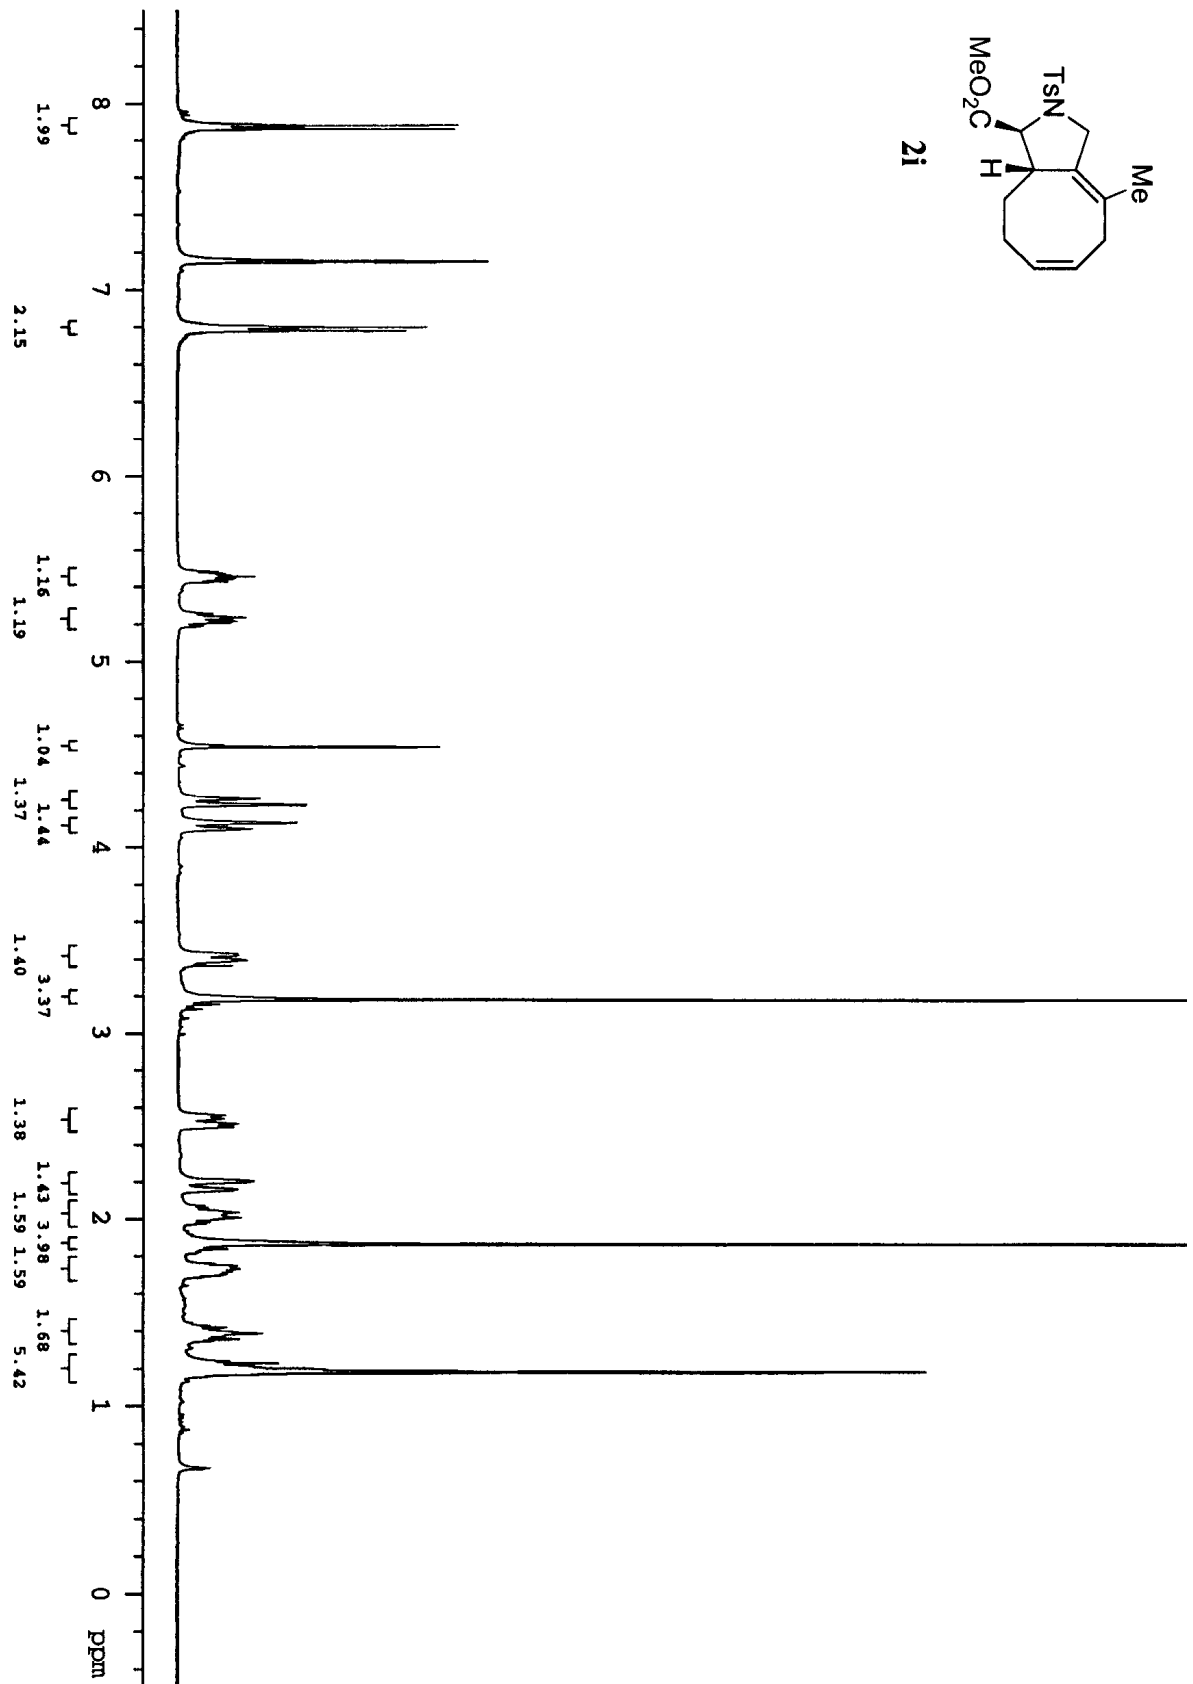

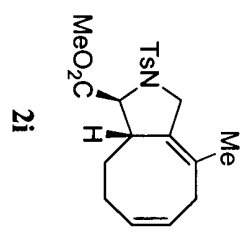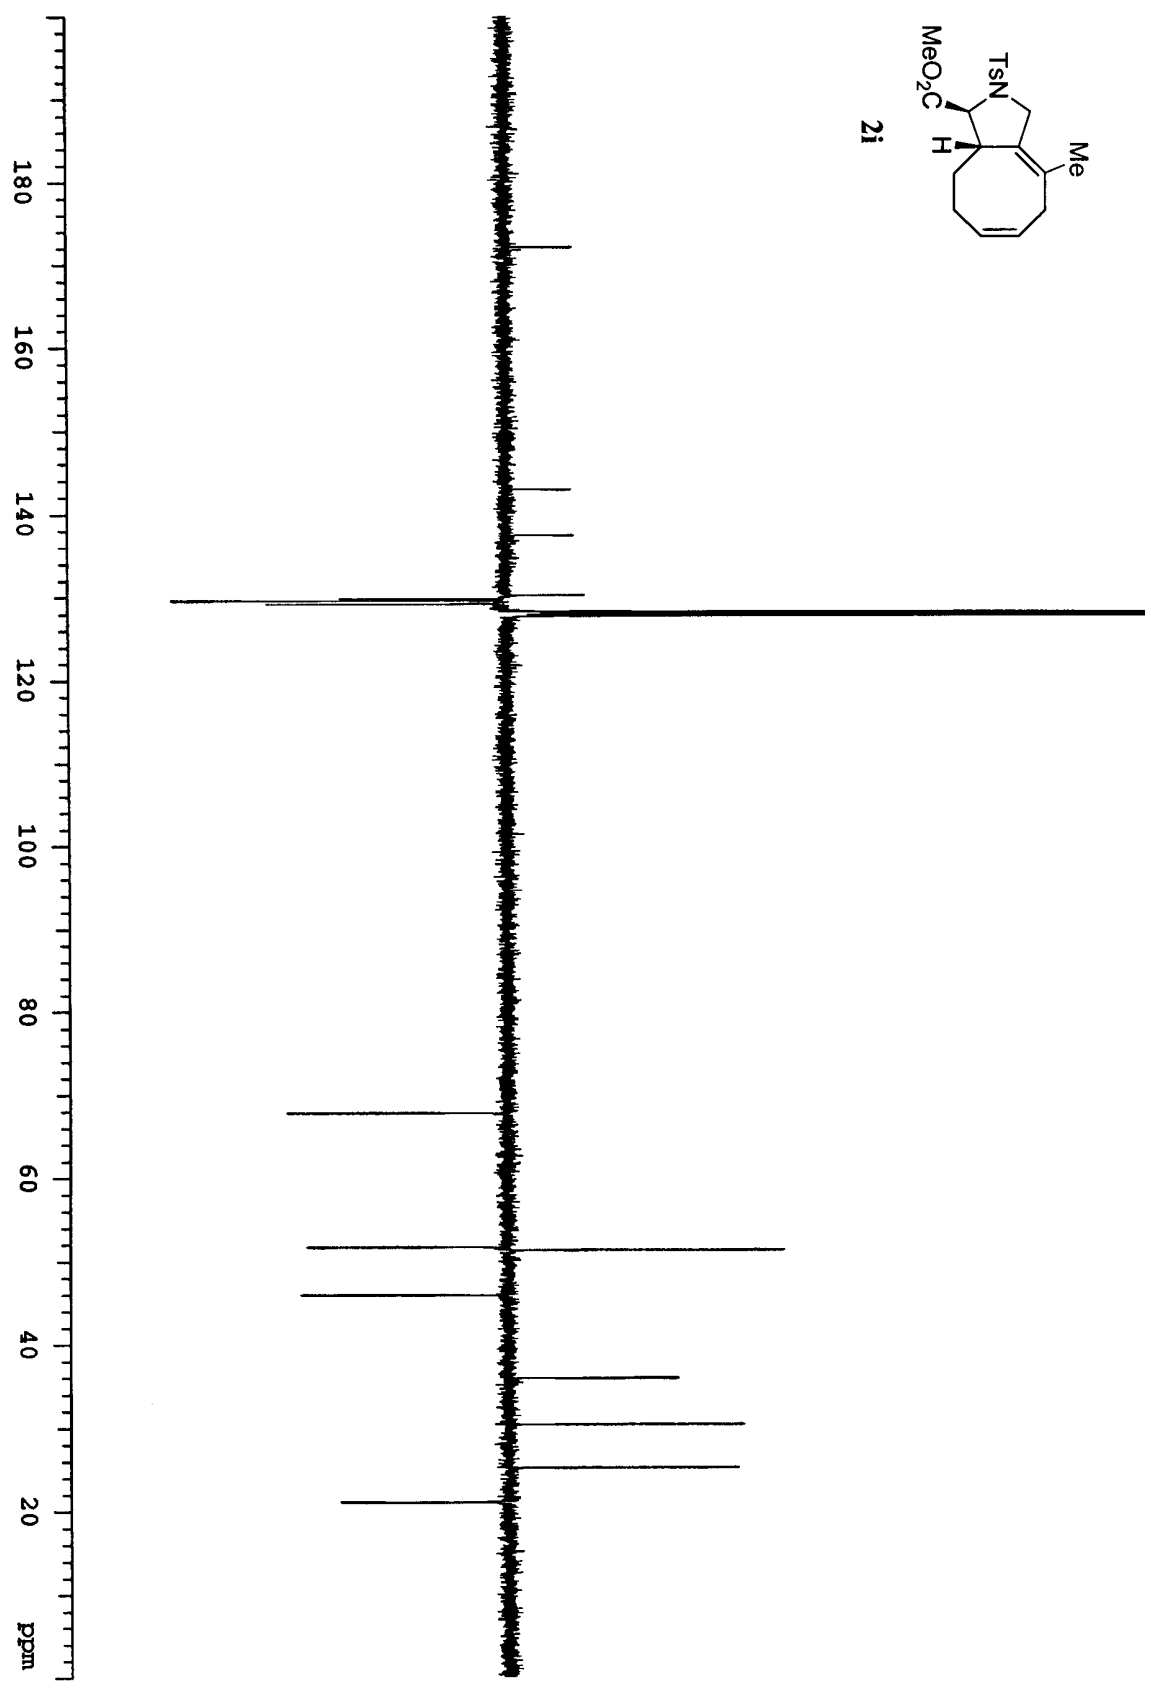

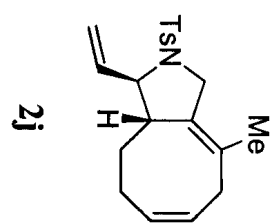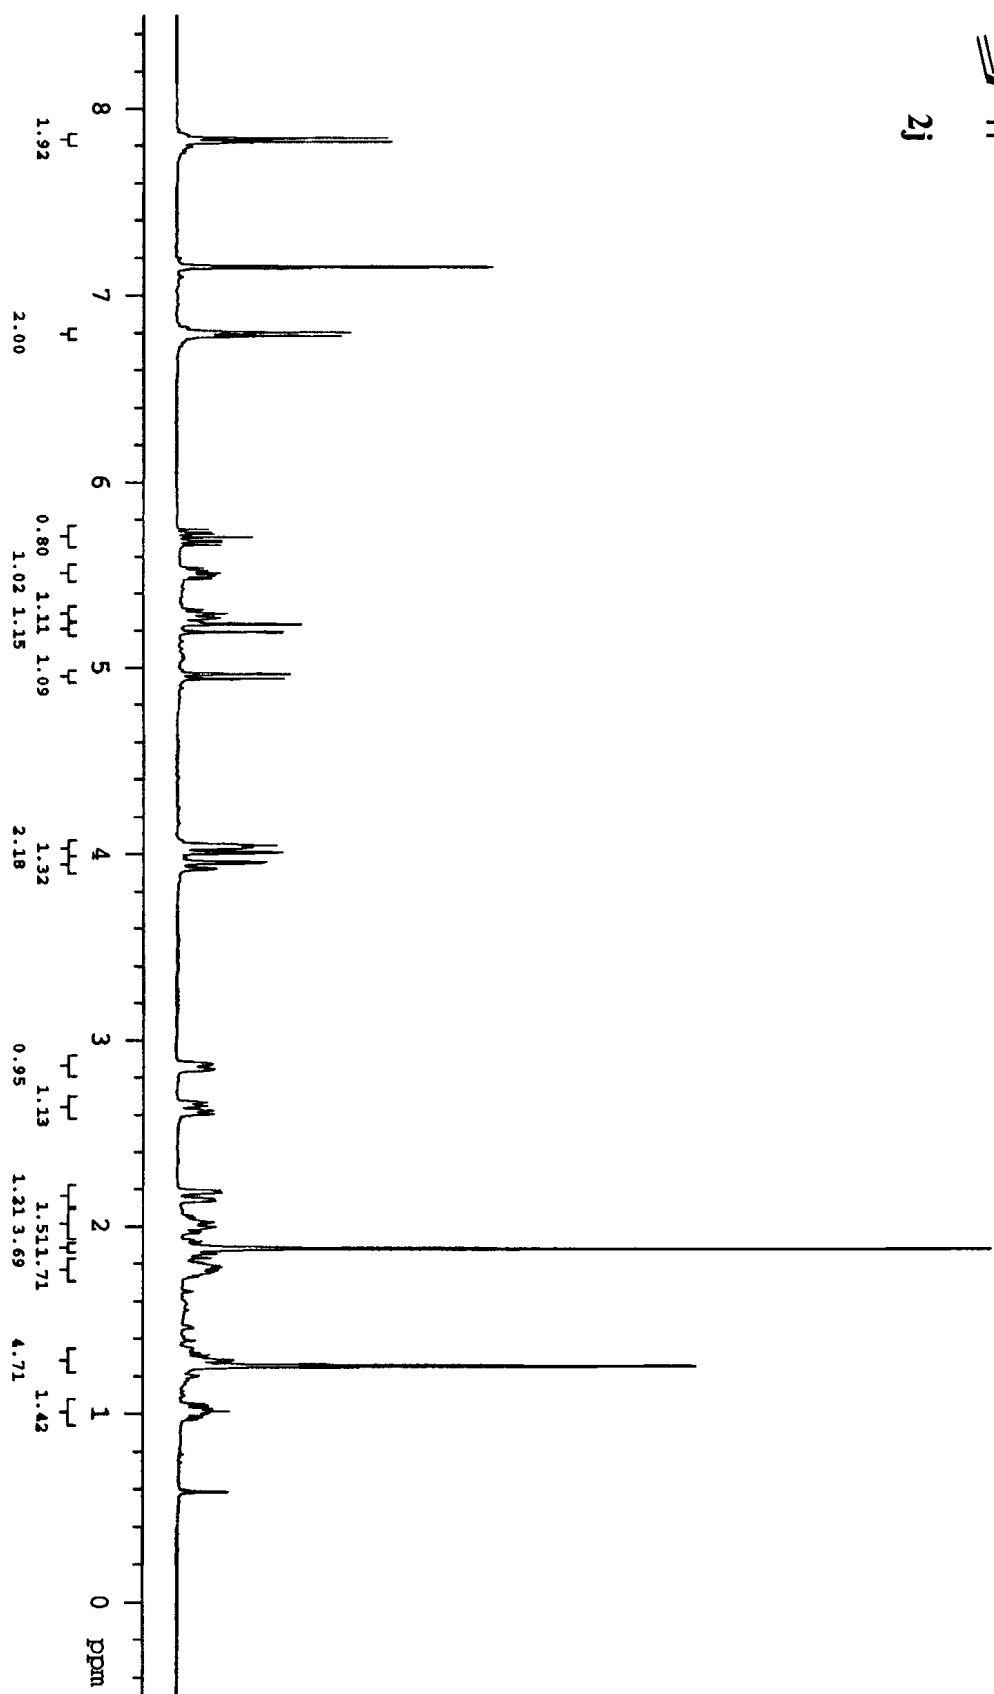

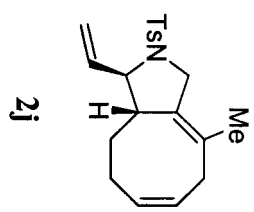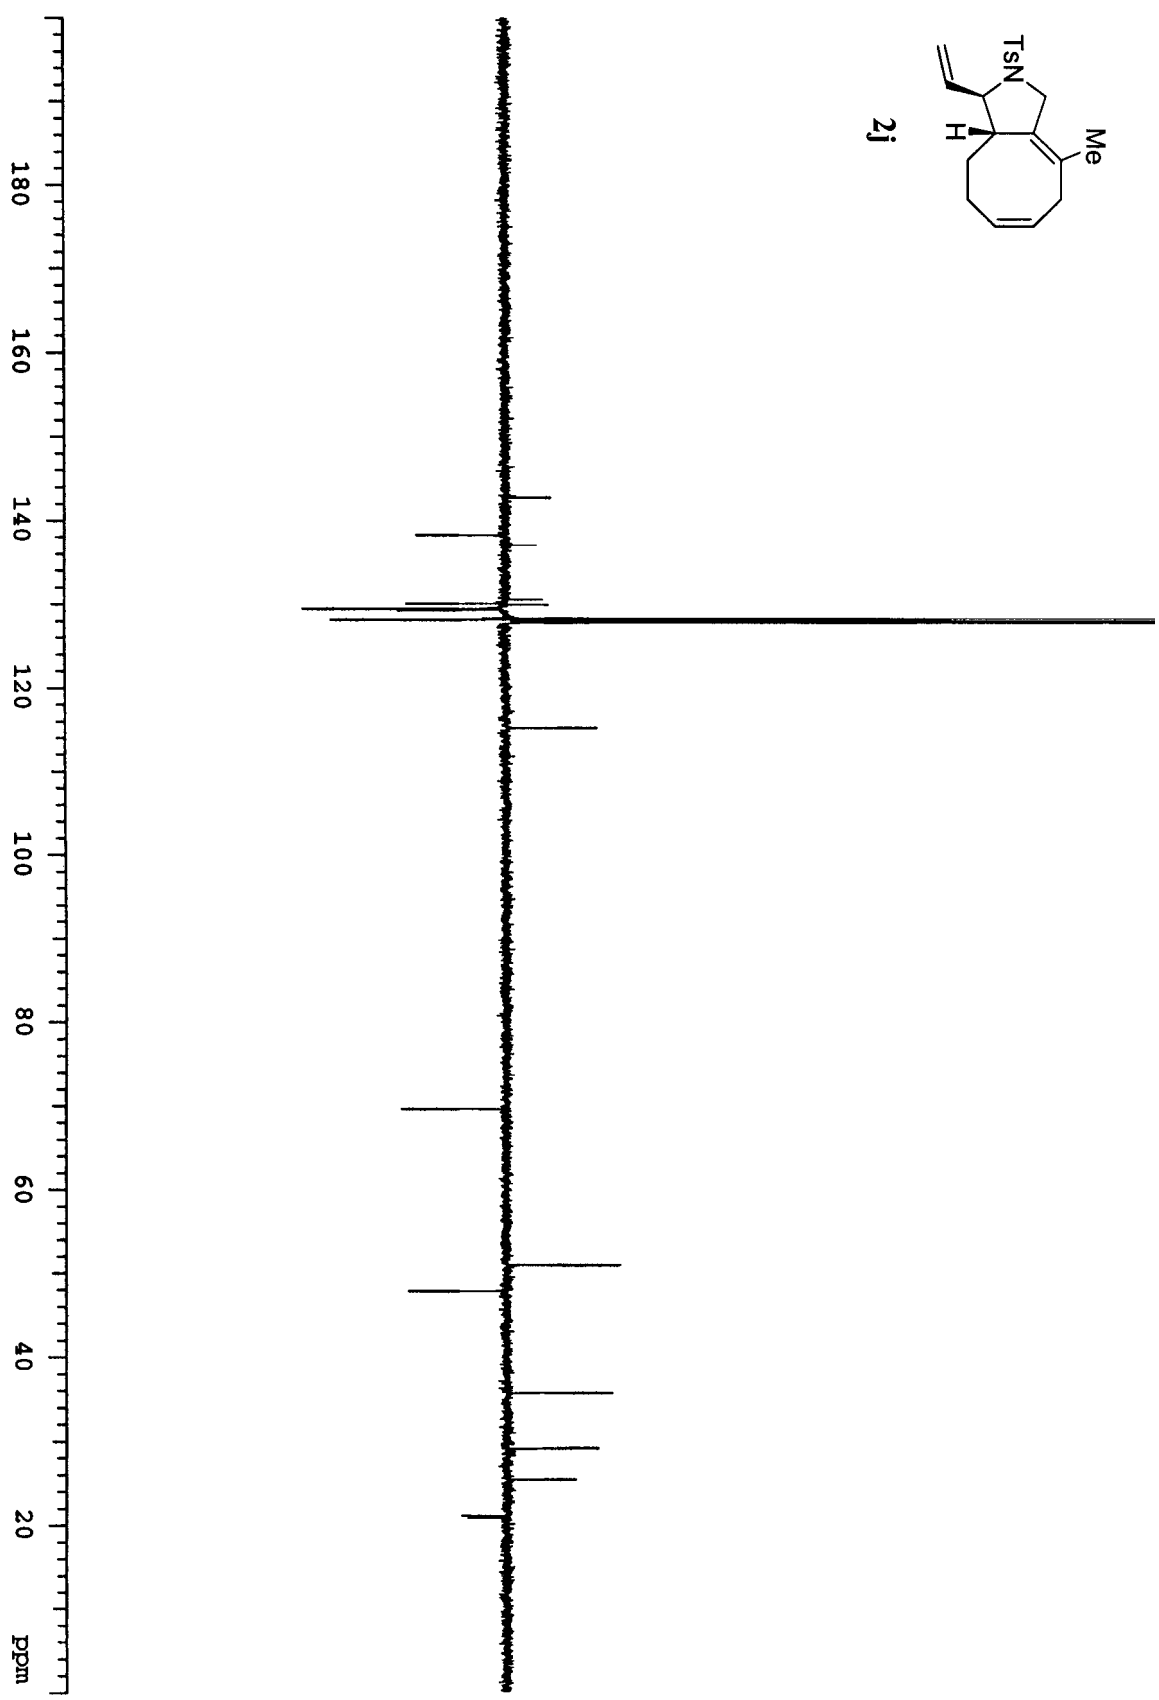



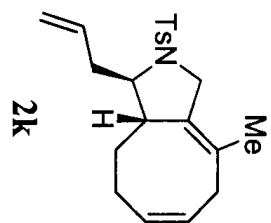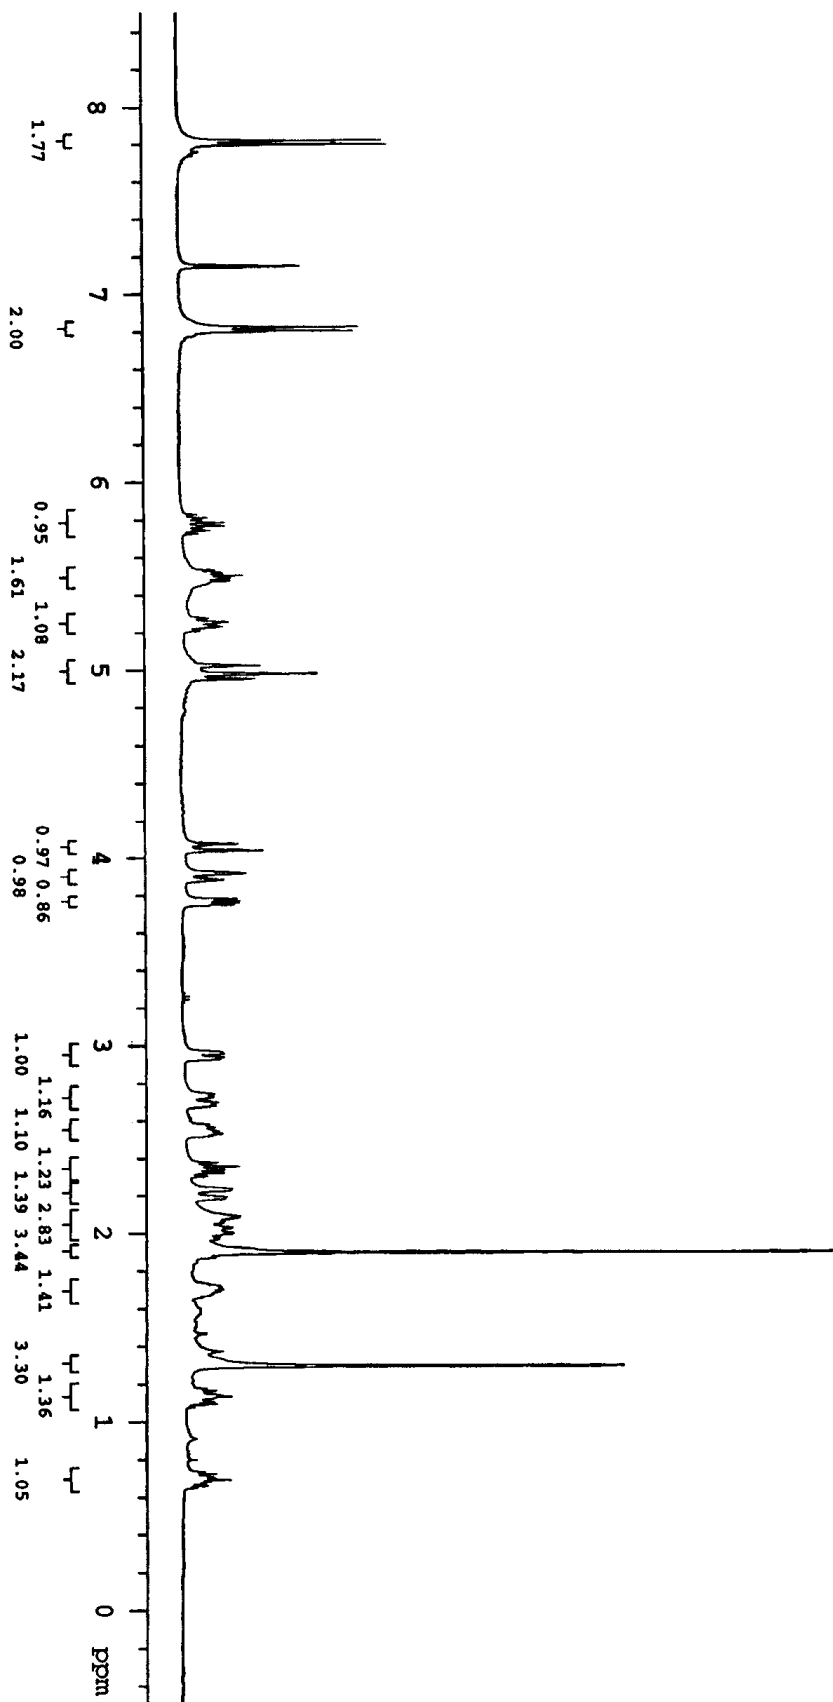

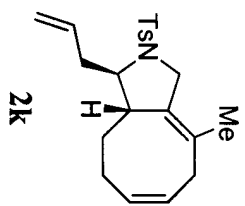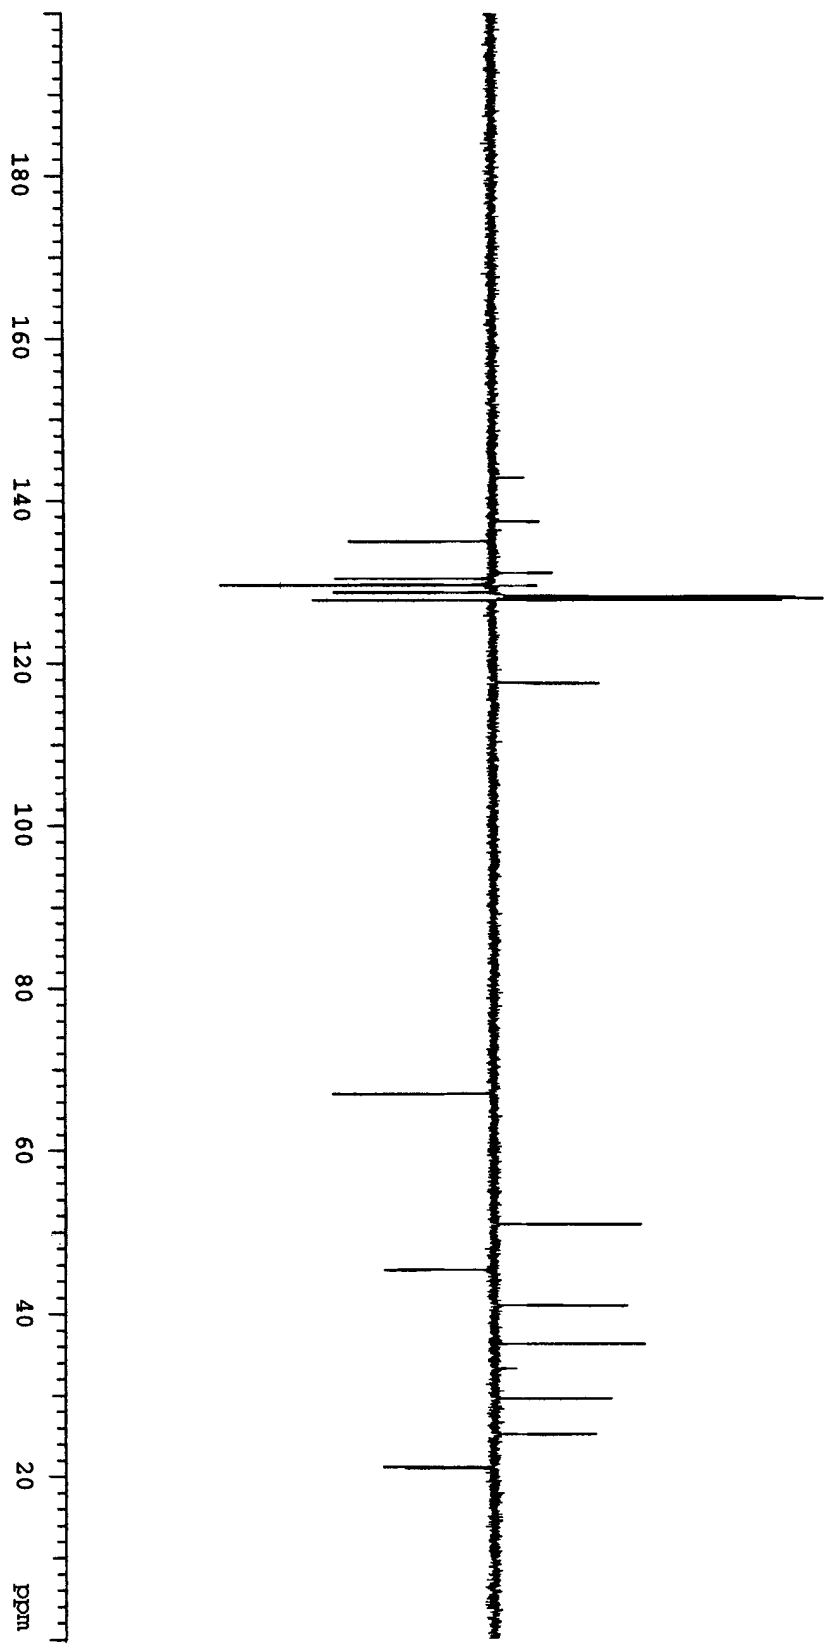

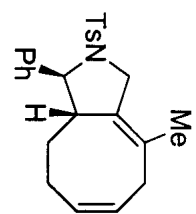

21

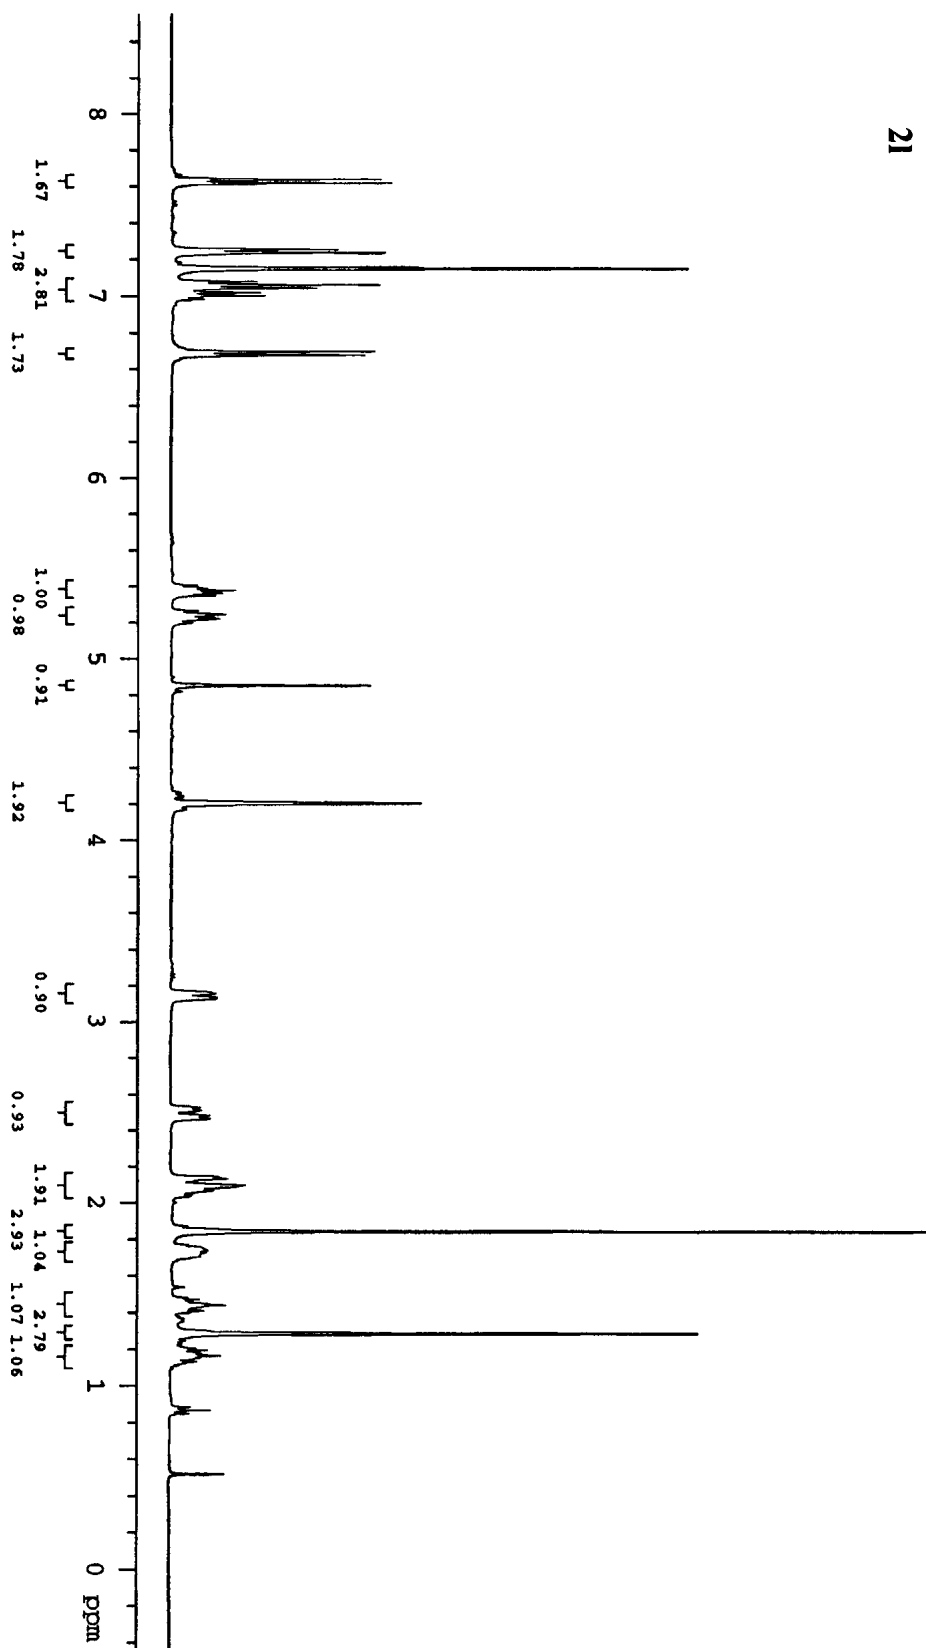

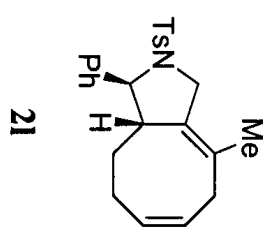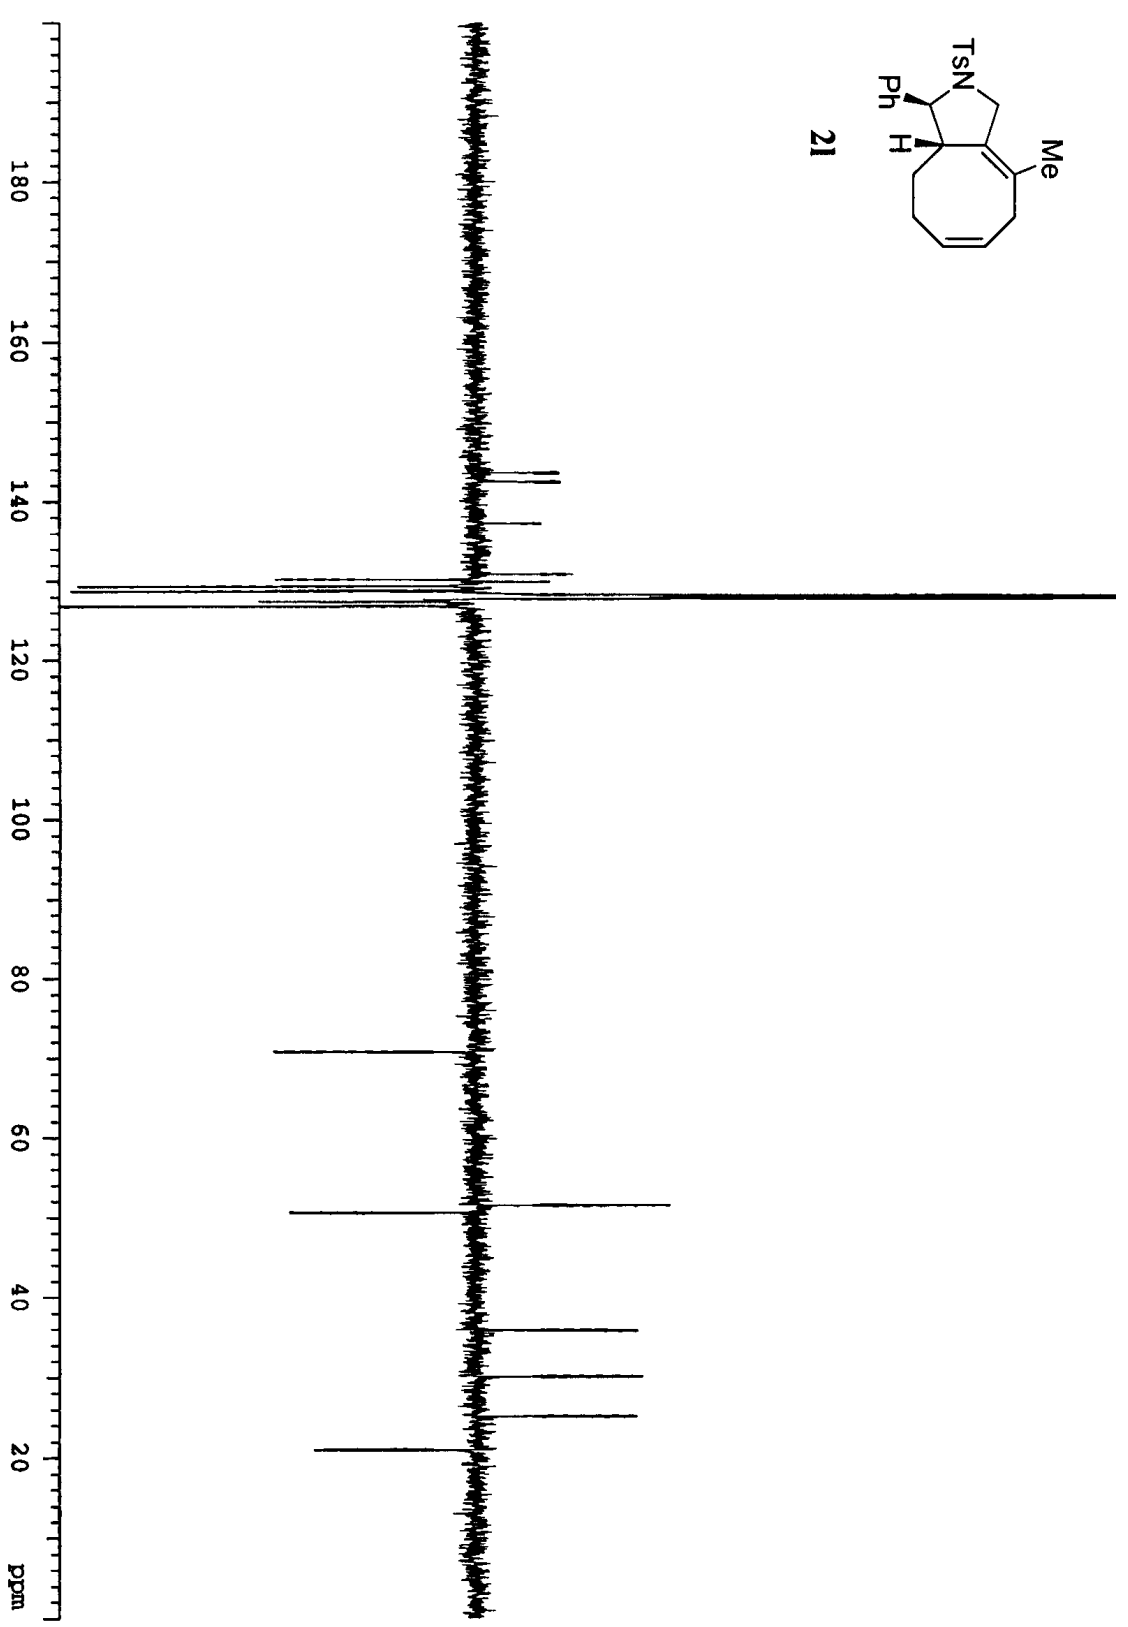

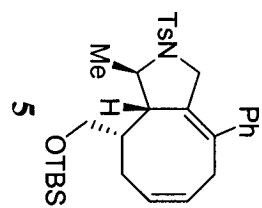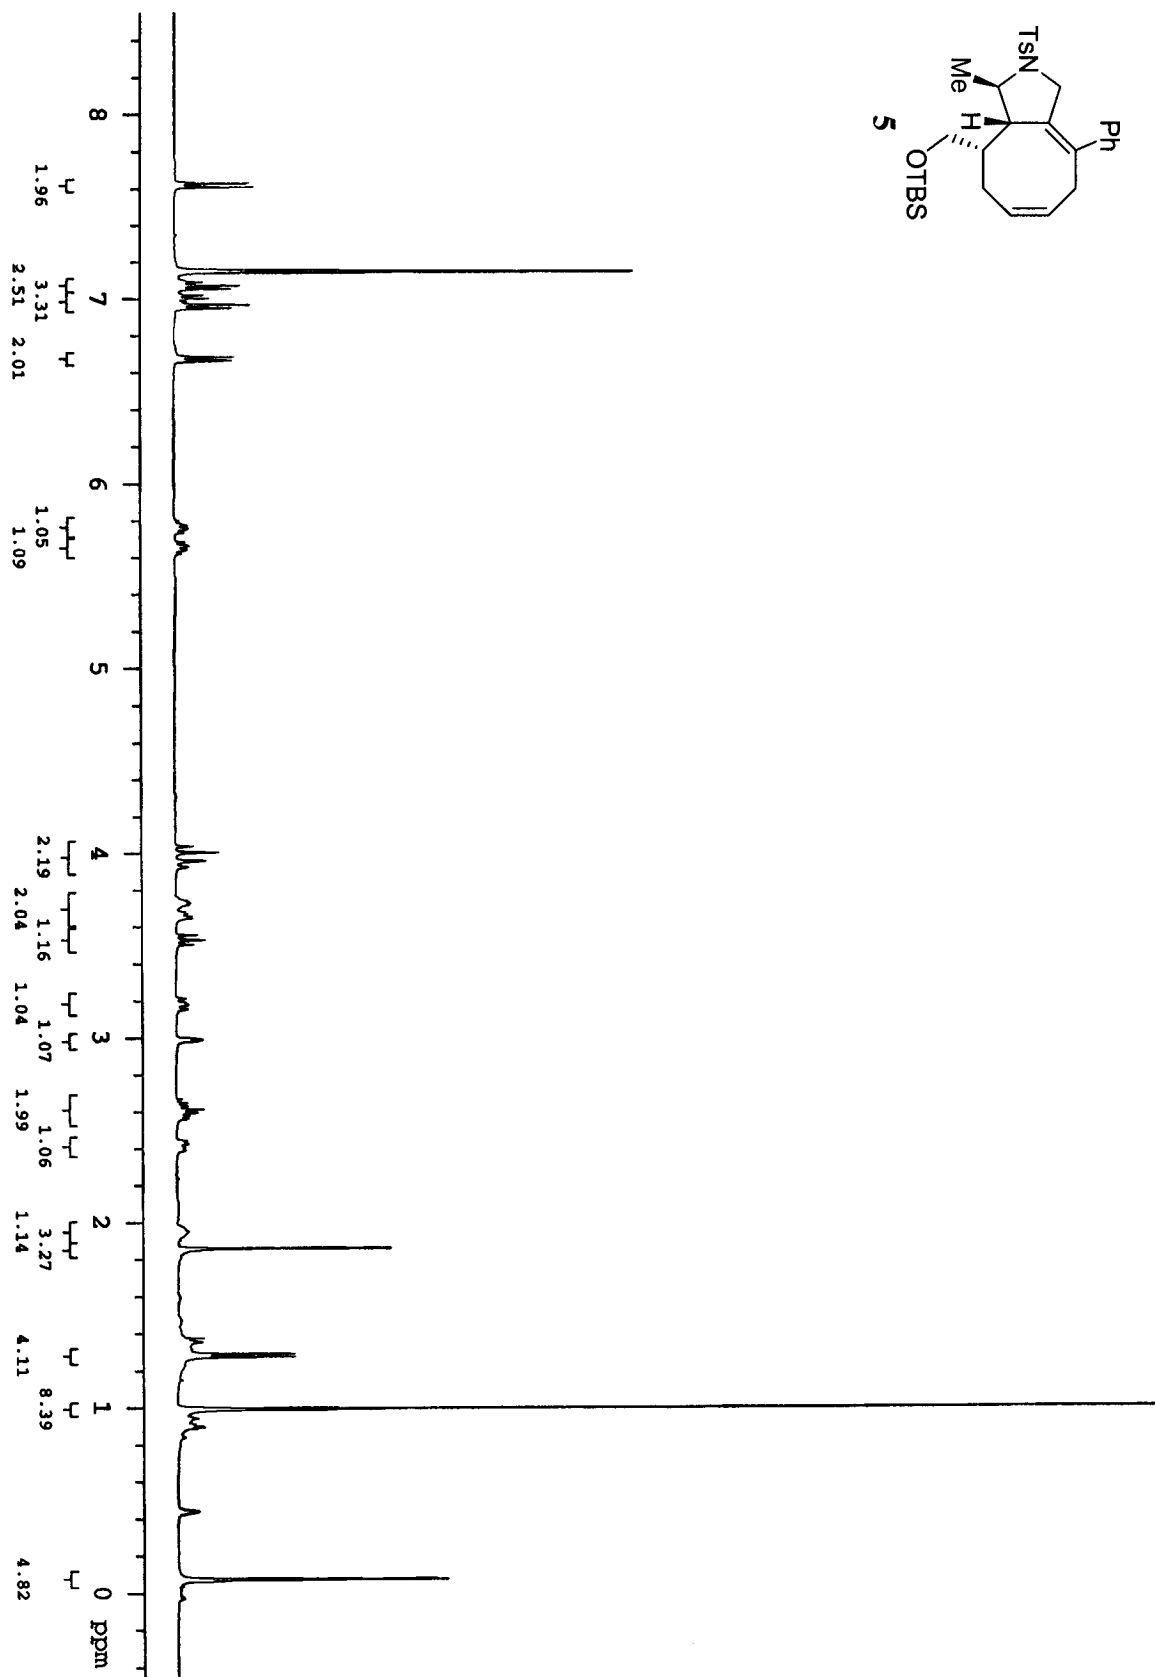



# Indiana University Molecular Structure Center

Report 03094:  $C_{29}H_{36}ClN_2Rh$

Maren Pink  
May 8, 2003

|                         |                                                      |
|-------------------------|------------------------------------------------------|
| Empirical Formula       | C <sub>29</sub> H <sub>36</sub> Cl N <sub>2</sub> Rh |
| Molecular Weight        | 550.96                                               |
| Instrument              | IUMSC SMART6000                                      |
| Crystal color           | yellow                                               |
| Crystal size            | 0.20 × 0.11 × 0.10 mm <sup>3</sup>                   |
| Crystal System          | Tetragonal                                           |
| Space Group             | I4 <sub>1</sub> /a                                   |
| Cell Dimensions (113 K) |                                                      |
| a =                     | 32.464 (2) Å                                         |
| b =                     | 32.464 Å                                             |
| c =                     | 9.9286 (7) Å                                         |
| α =                     | 90°                                                  |
| β =                     | 90°                                                  |
| χ =                     | 90°                                                  |
| Volume                  | 10463.7 (10) Å <sup>3</sup>                          |
| Z (Molecules/Cell)      | 16                                                   |
| Calculated Density      | 1.399 Mg/m <sup>3</sup>                              |
| Absorption Coefficient  | 0.774 mm <sup>-1</sup>                               |
| Final Residuals         |                                                      |
| R1, observed data       | 0.0276                                               |
| wR2, all data           | 0.0690                                               |

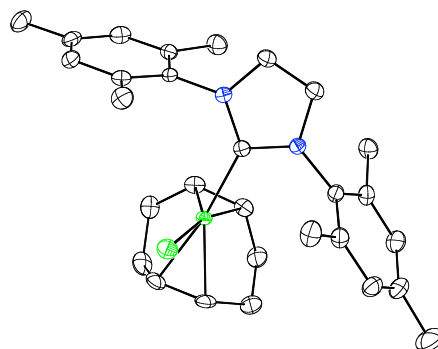

The sample was submitted by Erich Baum (research group of Prof. P. A. Evans, Department of Chemistry, Indiana University). A preliminary set of cell constants was calculated from reflections harvested from three sets of 20 frames. These initial sets of frames were oriented such that orthogonal wedges of reciprocal space were surveyed. This produced initial orientation matrices determined from 339 reflections. The data collection was carried out using Mo K $\alpha$  radiation (graphite monochromator) with a frame time of 15 seconds and a detector distance of 5.09 cm. A randomly oriented region of reciprocal space was surveyed to the extent of a quadrant. Two major sections of frames were collected with 0.30° steps in  $w$  at two different  $f$  settings and a detector position of  $-43^\circ$  in  $2\theta$ . An additional set of 80 frames was collected in order to model decay. Data to a resolution of 0.71 Å were considered in the reduction. Final cell constants were calculated from the xyz centroids of 7032 strong reflections from the actual data collection after integration. The intensity data were corrected for absorption.

The structure was found as proposed. C-H...X hydrogen bonds were observed.

Complete data are available at

<http://bl-chem-iumsc110.chem.indiana.edu/recipnet/showsample.jsp?sampleId=59057656>

# Indiana University Molecular Structure Center

**Report 03220:** C<sub>26</sub>H<sub>27</sub>N<sub>3</sub>O<sub>8</sub>S; CH<sub>2</sub>Cl<sub>2</sub>; 3,5-Dinitrobenzoate of **2f**

John C. Huffman

October 23, 2003

Empirical Formula: C<sub>27</sub>H<sub>29</sub>Cl<sub>2</sub>N<sub>3</sub>O<sub>8</sub>S  
Color of Crystal: pale yellow  
Crystal System: Monoclinic  
Space Group: P2(1)/n  
Cell Dimensions (at 118(2) K; 990 data)  
a = 11.1295(9)  
b = 10.5003(9)  
c = 24.1594(18)  
alpha = 90  
beta = 94.137(2)  
gamma = 90

Z (Molecules/cell): 4  
Volume: 2816.0(4)  
Calculated Density: 1.478  
Molecular Weight: 626.49  
Linear Absorption Coefficient: 0.360  
Final residuals are:  
R(F) (observed data) = 0.0465  
Rw(F2) (refinement data) = 0.1423

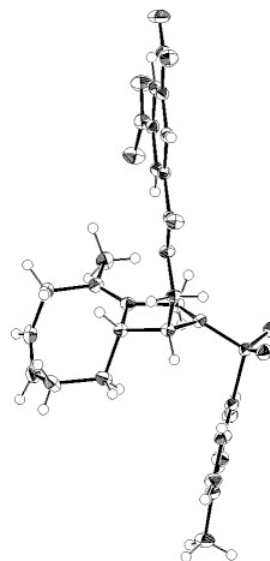

The sample was submitted by Aleem Fazal from the research group of Prof. P. A. Evans, Department of Chemistry, Indiana University. The crystals occur as pale yellow layered prisms that cleaved easily. A fragment of one of the plates of approximate dimensions 0.30 × 0.30 × 0.25 mm onto the tip of a 0.15 mm diameter glass fiber which was subsequently mounted on a SMART6000 (Bruker) and cooled to 118(2) K.

A preliminary set of cell constants was calculated from reflections obtained from three nearly orthogonal sets of 30 frames. The data collection was carried out using graphite monochromated Mo K $\alpha$  radiation with a frame time of 2 seconds and a detector distance of 5.0 cm. A randomly oriented region of a sphere in reciprocal space was surveyed. Six sections of 606 frames were collected with 0.30° steps in  $\omega$  at different  $\phi$  settings with the detector set at -43° in 2 $\theta$ . Final cell constants were calculated from the xyz centroids of 990 strong reflections from the actual data collection after integration (SAINT).

Complete data are available at

<http://bl-chem-iumsc110.chem.indiana.edu/recipnet/showsample.jsp?sampleId=59057303&sampleHistoryId=-1>



# Indiana University Molecular Structure Center

**Report 03228:** C<sub>32</sub>H<sub>31</sub>N<sub>3</sub>O<sub>8</sub>S; 3,5-Dinitrobenzoate of **5**

John C. Huffman

October 31, 2003

Empirical Formula: C<sub>32</sub>H<sub>31</sub>N<sub>3</sub>O<sub>8</sub>S  
Color of Crystal: colorless  
Crystal System: Monoclinic  
Space Group: P2(1)/c  
Cell Dimensions (at 110(2) K; 911 data)  
a = 13.3244(14)  
b = 7.2183(8)  
c = 30.905(3)  
alpha = 90  
beta = 100.270(3)  
gamma = 90

Z (Molecules/cell): 4  
Volume: 2924.8(5)  
Calculated Density: 1.403  
Molecular Weight: 617.66  
Linear Absorption Coefficient: 0.169  
Final residuals are:  
R(F) (observed data) = 0.0405  
Rw(F2) (refinement data) = 0.1045

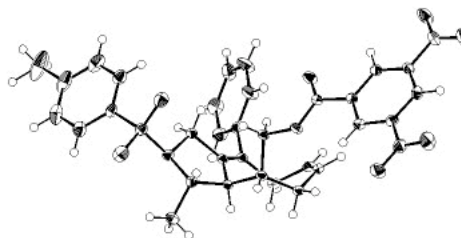

The sample was submitted by Aleem Fazal from the research group of Prof. P. A. Evans, Department of Chemistry, Indiana University. The crystals occur as elongated transparent prism plates that tend to grow in clumps. A well-formed typical sample was cleaved to form a fragment of dimensions 0.25 × 0.14 × 0.10 mm onto the tip of a 0.1 mm diameter glass fiber which was subsequently mounted on a SMART6000 (Bruker) and cooled to 11(02) K.

A preliminary set of cell constants was calculated from reflections obtained from three nearly orthogonal sets of 30 frames. The data collection was carried out using graphite monochromated Mo K $\alpha$  radiation with a frame time of 15 seconds and a detector distance of 5.0 cm. A randomly oriented region of a sphere in reciprocal space was surveyed. Four sections of 606 frames were collected with 0.30° steps in  $\omega$  at different  $\phi$  settings with the detector set at -43° in  $2\theta$ . Final cell constants were calculated from the xyz centroids of 911 strong reflections from the actual data collection after integration (SAINT).

Complete data are available at

<http://bl-chem-iumsc110.chem.indiana.edu/recvnet/jamm.jsp?sampleId=59057557&sampleHistoryId=-1>
